# Supplementary material for: Health Care Resource Utilization and Costs among Adult Patients with Advanced Soft Tissue Sarcoma: A Retrospective Medical Record Review in the United Kingdom, Spain, Germany, and France
Source: Sarcoma. 2018 Sep 12;2018:2020591. doi: 10.1155/2018/2020591 (PMC6157208; doi:10.1155/2018/2020591)
Supplement: (Supplementary Materials) — The supplementary appendix provides detailed information on unit costs, health care resource utilization, and hospitalization patterns by country. [file 2020591.f1.xlsx]

## Sheet: S1. UK Unit Costs
Supplementary Table 1. Unit Costs Related to Treatment of Advanced STS: United Kingdoma
Systemic anticancer drug acquisition costs	Cost per mgb	Sources and assumptions
Carboplatin	0.333333	BNF (2016); MIMS (2016)
Cisplatin	0.5022
Crizotinib	0.3126
Dacarbazine	0.07
Dactinomycin (i.e., actinomycin-D)	105.16
Daunorubicin	3.25
Docetaxel	4.7275
Doxorubicin	1.828
Doxorubicin (pegylated liposomal)	14.2498
Etoposide	0.115
Gemcitabine	0.125
Ifosfamide	0.08994
Paclitaxel	1.9995
Pazopanib	0.0934167
Sunitinib	2.242
Trabectedin	1366
Vinblastine	1.7
Vincristine	13.18
Systemic anticancer drug administration costsc	Cost for first administrations	Cost for subsequent administrationsd	Sources and assumptions
Cost per administration (by regimen)
Doxorubicin	185.532	185.532	Cost to deliver simple parenteral chemotherapy at first attendance (Currency Code SB12Z); assumed same cost for subsequent administrations
Doxorubicin + ifosfamide mesna	325.937	204.471	Cost to deliver complex chemotherapy, including prolonged infusional treatment, at first attendance (Currency Code SB14Z)
Docetaxel + gemcitabine	251.453	204.471	Cost to deliver more complex parenteral chemotherapy at first attendance (Currency Code SB13Z)
Ifosfamide mesna	325.937	204.471	Cost to deliver complex chemotherapy, including prolonged infusional treatment, at first attendance (Currency Code SB14Z)
Dacarbazine + doxorubicin + ifosfamide mesna	325.937	204.471	Cost to deliver complex chemotherapy, including prolonged infusional treatment, at first attendance (Currency Code SB14Z)
Pazopanib	163.854	N/A	Cost to deliver exclusively oral chemotherapy (Currency Code SB11Z); assumed cost applied once per line of therapy
Trabectedin	325.937	204.471	Cost to deliver complex chemotherapy, including prolonged infusional treatment, at first attendance (Currency Code SB14Z)
Gemcitabine	185.532	185.532	Cost to deliver simple parenteral chemotherapy at first attendance (Currency Code SB12Z); assumed same cost for subsequent administrations
Paclitaxel	325.937	204.471	Cost to deliver complex chemotherapy, including prolonged infusional treatment, at first attendance (Currency Code SB14Z)
Other oral anticancer drugs (i.e., crizotinib, sunitinib)	163.854	N/A	Cost to deliver exclusively oral chemotherapy (Currency Code SB11Z); assumed cost applied once per line of therapy
Other non-oral anticancer drugs	246.652	204.471	Assumed weighted average cost to deliver simple or complex chemotherapy, excluding exclusively oral chemotherapy (Currency Codes SB12Z, SB13Z, SB14Z)
Health care visit costs	Cost	Sources and assumptions
Outpatient visits (cost per visit)
Outpatient office visits	152.653	NHS (2015); Assumed weighted average cost of all consultant-led face-to-face first and follow-up outpatient attendances with service description of "Medical Oncology", or "Clinical Oncology" (codes 370 and 800), including multi-professional outpatient attendances (Currency Codes WF01A, WF01B, WF02A, and WF02B)
Outpatient nurse visits	107.44	NHS (2015); Assumed weighted average cost of all non-consultant face-to-face first and follow-up outpatient attendances with service description of "Medical Oncology", or "Clinical Oncology" (codes 370 and 800), including multi-professional outpatient attendances (Currency Codes WF01A, WF01B, WF02A, and WF02B)
Outpatient palliative care visits	118.301	NHS (2015); Assumed weighted average outpatient cost of a medical and non-medical specialist palliative care attendance (19 years and over) (Currency Codes SD04A and SD05A)
Accident and emergency (A&E) visits	116.518	NHS (2015); Assumed weighted average cost of category 1-2 investigation with category 1-2 treatment and no investigation with no significant treatment) (Currency Codes VB07Z, VB08Z, VB09Z, and VB11Z)
Inpatient hospitalizations (cost per day)
By ward
General/medical ward, oncology ward, or other/unknown ward for hospitalizations for treatment-related procedures (e.g., surgery, radiotherapy)	763.248	NHS (2015); Assumed the daily cost of an elective inpatient stay for respiratory neoplasms with a single intervention (with CC score 0-5); national average unit cost was £2,481.80 with an average length of stay of 3.25 days (Currency Code DZ17R)
General/medical ward, oncology ward, or other/unknown ward for hospitalizations not for treatment-related procedures	593.952	NHS (2015); Assumed the daily cost of an elective inpatient stay for respiratory neoplasms without interventions (with CC score 0-3); national average unit cost was £1,518.30 with an average length of stay of 2.56 days (Currency Code DZ17V)
Intensive care unit (cost per episode)	1292.85	NHS (2015); Assumed the cost per episode of critical care for any number of organs supported, including service descriptions of "non-specific general adult critical care patients predominate" and "medical adult patients (unspecified specialty)" (Currency Codes CCU01 and CCU03)
Inpatient end-of-life care (cost per day)
Long-term care facility	101.143	Curtis and Burns (2015); Assumed the average direct unit cost of private sector nursing homes for older people and private sector residential care for older people, with daily cost applied to the reported length of stay
Hospice	380.747	Coyle et al. (1999); Assumed the average cost per day in an inpatient hospice unit, with daily cost applied to an assumed 13.4 day length of stay (based on a 2011-2012 national survey of specialist palliative care services in the UK [The National Council for Palliative Care, 2013])
Supportive care costs	Cost per unite	Unit	Sources and assumptions
Pain control
Opiate analgesics	0.2272	Day	BNF (2016); Assumed 30 mg codeine phosphate taken 4 times daily during the full line of therapy or period following end of last therapy (based on common analgesics for pain in patients with lung cancer [Simmons et al., 2012])
Other analgesics	0.0712	Day	BNF (2016); Assumed 1,000 mg paracetamol taken 4 times daily during the full line of therapy or period following end of last therapy (based on common analgesics for pain in patients with lung cancer [Simmons et al., 2012])
Radiotherapy	1316.93	One-time cost	NHS (2015); Assumed cost to "Deliver a fraction of complex treatment on a megavoltage machine" in outpatient setting (Currency Code SC23Z)
Psychological intervention	277.461	One-time cost	Curtis (2014); Assumed weekly visits for 6 weeks, using the hourly cost of counselling services in primary medical care (£50) with a consultation time of 55 minutes
Sedation for refractory pain	139.516	One-time cost	NHS (2015); Assumed the average outpatient cost of pain management (Service Code 191)
Epidural infusions	--	--	--
Splanchnic nerve block	--	--	--
Other	--	--	--
Antiemetics	3.52	Cycle	BNF (2016); Assumed 16 mg ondansetron taken daily for 5 days per cycle of chemotherapy (based on ESMO guidelines for the prevention of chemotherapy- and radiotherapy-induced nausea and vomiting [Roila et al., 2010])
Antibiotics	9.1	One-time course	BNF (2016); Assumed 500 mg of levofloxacin once daily for 7 days (based on clinical trial by Cullen et al. (2005) that investigated antibacterial prophylaxis after chemotherapy for solid tumors and lymphomas)
Antifungals	1.71429	Day	BNF (2016); Assumed 400 mg fluconazole taken daily during the full line of therapy or period following end of last therapy (based on clinical trial from Winston et al. [2000] that investigated antifungal therapy of febrile neutropenic patients with cancer)
Antivirals	--	--	--
Dexrazoxane	--	--	--
Transfusions
Red blood cell transfusion	332	One-time cost	NICE (2015); Assumed cost of two units of blood transfused.
Platelet transfusion	332	One-time cost	NICE (2015); Assumed cost of two units of blood transfused.
Other	--	--	--
Antianxiety, antidepressant drugs	0.98	One-time course	BNF (2016); Assumed 20 mg fluoxetine taken daily for 5 weeks (Riblet et al., 2014)
Growth factors
WBC growth factors	0.832292	Cost per kg per day	BNF (2016); Assumed 5 µg/kg of filgrastim per day for 7 days for each cycle during the line of therapy in which the patient was reported to receive growth factors, or for a total of up to 7 days in the period following end of last therapy if the patient was reported to receive growth factors during this time
Erythropoiesis stimulating agents	--	--	--
Other	--	--	--
Bisphosphonates	147.9	Every 4 weeks	BNF (2016); Assumed 4mg zoledronic acid taken every 4 weeks during the full line of therapy or period following end of last therapy (based on ESMO guidelines on bone health in cancer patients [Coleman et al., 2014])
Referral to psychiatrist, psychologist, or other professional for distress management	277.461	One-time cost	Curtis (2014); Assumed weekly visits for 6 weeks, using the hourly cost of counseling services in primary medical care (£50) with a consultation time of 55 minutes
Oxygen	2.90012	Day	NHS (2011); Assumed average annual cost of home user of oxygen
Radiation therapy, excluding utilization for pain control	1316.93	One-time cost	NHS (2015); Assumed cost to "Deliver a fraction of complex treatment on a megavoltage machine" in outpatient setting (Currency Code SC23Z)
Nutritional support	79.4749	One-time cost	NHS (2015); Assumed one-time cost of oral/nasogastric tube, using the average cost of "specialist nursing, enteral feeding nursing services, adult, face to face" (Currency Code N16AF)
Corticosteroids, excluding utilization for pain control	2.52	Day	BNF (2016); Assumed 6 mg dexamethasone taken daily during the full line of therapy or period following end of last therapy (Simmons et al., 2012)
Tests as part of supportive care
Computed tomography (CT) scan	104.066	One-time cost	NHS (2015); Assumed average cost of “Computerised Tomography Scan of one area, with post contrast only, 19 years and over” (Currency Code RD21A)
Positron emission tomography (PET) scan (whole body)	516.997	One-time cost	NHS (2015); Assumed average cost of “Positron Emission Tomography (PET), 19 years and over” (Currency Code RN07A)
GI endoscope	428.148	One-time cost	NHS (2015); Assumed average cost of “Diagnostic Endoscopic Upper Gastrointestinal Tract Procedures, 19 years and over” (Currency Code FZ60Z)
Magnetic Resonance Imaging (MRI)	164.24	One-time cost	NHS (2015); Assumed average cost of “Magnetic Resonance Imaging Scan of one area, with post contrast only, 19 years and over” (Currency Code RD02A)
Multi Gated Acquisition Scan (MUGA)	192.122	One-time cost	NHS (2015); Assumed average cost of “Multi Gated Acquisition (MUGA) Scan” (Currency Code RN22Z)
a Costs are in 2015/2016 British pounds and were inflated when necessary using the Hospital and Community Health Services price inflation index (Curtis and Burns, 2015).
b Systemic anticancer drug costs were obtained from the British National Formulary (BNF, 2016); MIMS (2016) was used as a secondary source for drug costs not included in the BNF. To estimate anticancer drug costs, the drug formulation with the lowest cost per milligram was selected, assuming no wastage. Physicians were assumed to have reported the initial dose per administration for each anticanc…
c Systemic anticancer drug administration costs were obtained from the 2014-2015 National Health Service (NHS) Schedule of Reference Costs, assuming administration in an outpatient setting. Regimen-specific administration costs were determined for the top five regimens in first-line through third-line therapy. For all other regimens, weighted average costs of first administrations (for oral and n…
d Unless otherwise noted, systemic anticancer drug administration costs for subsequent administrations assumed the cost to deliver subsequent elements of a chemotherapy cycle (Currency Code SB15Z).
e Supportive care drug costs were obtained from the British National Formulary (BNF, 2016) for a representative cost of the dose/drug noted.
References:
British National Formulary (BNF). Drugs: NHS indicative prices. 2016. Available at: https://www.medicinescomplete.com/mc/bnf/current/.
Coleman R, Body JJ, Aapro M, Hadji P, Herrstedt J; ESMO Guidelines Working Group. Bone health in cancer patients: ESMO Clinical Practice Guidelines. Ann Oncol. 2014 Sep;25 Suppl 3:iii124-37.
Coyle D, Small N, Ashworth A, Hennessy S, Jenkins-Clarke S, Mannion R, et al. Costs of palliative care in the community, in hospitals and in hospices in the UK. Crit Rev Oncol Hematol. 1999 Nov;32(2):71-85.
Cullen M, Steven N, Billingham L, Gaunt C, Hastings M, Simmonds P, et al. Antibacterial prophylaxis after chemotherapy for solid tumors and lymphomas. N Engl J Med. 2005 Sep 8;353(10):988-98.
Curtis L. Unit costs of health and social care 2014. Personal Social Services Research Unit, University of Kent, Canterbury, 2014. Available at: http://www.pssru.ac.uk/project-pages/unit-costs/2014/.
Curtis L, Burns A. Unit costs of health and social care 2015. Personal Social Services Research Unit, University of Kent, Canterbury, 2015. Available at: http://www.pssru.ac.uk/project-pages/unit-costs/2015/.
Monthly Index of Medical Specialties (MIMS). Haymarket Medical Media, London. Available at: http://www.mims.co.uk/.
The National Council for Palliative Care. National Survey of Patient Activity Data for Specialist Palliative Care Services: MDS Full Report for the year 2011-2012. 2013. Available at: http://www.ncpc.org.uk/sites/default/files/MDS%20Full%20Report%202012.pdf.
National Health Service (NHS). Home oxygen service - assessment and review, good practice guide. April 2011. Available at: https://www.networks.nhs.uk/nhs-networks/respiratory-leads/news/new-good-practice-guide-home-oxygen-assessment-review.
National Health Service (NHS). National schedule of reference costs: the main schedule. 2015. Available at: https://www.gov.uk/government/publications/nhs-reference-costs-2014-to-2015.
National Institute for Health and Care Excellence (NICE). National costing statement: blood transfusion. November 2015. Available at: https://www.nice.org.uk/guidance/ng24/resources/costing-statement-2177158141.
Riblet N, Larson R, Watts BV, Holtzheimer P. Reevaluating the role of antidepressants in cancer-related depression: a systematic review and meta-analysis. Gen Hosp Psychiatry. 2014 Sep-Oct;36(5):466-73.
Roila F, Herrstedt J, Aapro M, Gralla RJ, Einhorn LH, Ballatori E, et al.; ESMO/MASCC Guidelines Working Group. Guideline update for MASCC and ESMO in the prevention of chemotherapy- and radiotherapy-induced nausea and vomiting: results of the Perugia consensus conference. Ann Oncol. 2010 May;21 Suppl 5:v232-43.
Simmons CP, Macleod N, Laird BJ. Clinical management of pain in advanced lung cancer. Clin Med Insights Oncol. 2012;6:331-46.
Winston DJ, Hathorn JW, Schuster MG, Schiller GJ, Territo MC. A multicenter, randomized trial of fluconazole versus amphotericin B for empiric antifungal therapy of febrile neutropenic patients with cancer. Am J Med. 2000 Mar;108(4):282-9.

## Sheet: S2. Spain Unit Costs
Supplementary Table 2. Unit Costs Related to Treatment of Advanced STS: Spaina
Systemic anticancer drug acquisition costs	Cost per mgb	Sources and assumptions
Bleomycin	1.08	BOT PLUS. www.botplusweb.portalfarma.com/[BLEOMICINA MYLAN] Cost obtained in 2016 (NWP). Cost is presented as a cost per UI, which is the standard unit for specifying bleomycin doses.
Carboplatin	0.15	BOT PLUS. www.botplusweb.portalfarma.com/[Carboplatino ACCORD EFG] Cost obtained in 2016 (NWP)
Cisplatin	0.22	BOT PLUS. www.botplusweb.portalfarma.com/[Cisplatino ACCORD EFG] Cost obtained in 2016 (NWP)
Crizotinib (XALKORI)	0.35	BOT PLUS. www.botplusweb.portalfarma.com/[Xalkori] Cost obtained in 2016 (NWP)
Cyclophosphamide (GENOXAL)	0.01	BOT PLUS. www.botplusweb.portalfarma.com/[Genoxal] Cost obtained in 2016 (NWP)
Dacarbazine	0.03	BOT PLUS. www.botplusweb.portalfarma.com/[Dacarbazina Medac] Cost obtained in 2016 (NWP)
Dactinomycin (i.e., actinomycin-D)	-	Not marketed in Spain
Docetaxel	2.2	BOT PLUS. www.botplusweb.portalfarma.com/[Docetaxel ACCORD EFG] Cost obtained in 2016 (NWP)
Doxorubicin	0.27	BOT PLUS. www.botplusweb.portalfarma.com/[Doxorrubicina ACCORD EFG] Cost obtained in 2016 (NWP)
Doxorubicin (pegylated liposomal) (MYOCET)	9.25	BOT PLUS. www.botplusweb.portalfarma.com/[Myocet] Cost obtained in 2016 (NWP)
Epirubicin	0.45	BOT PLUS. www.botplusweb.portalfarma.com/[Epirubicina ACCORD EFG] Cost obtained in 2016 (NWP)
Etoposide	0.05	BOT PLUS. www.botplusweb.portalfarma.com/[ETOPOSIDO SANDOZ EFG] Cost obtained in 2016 (NWP)
Everolimus (AFINITOR)	11	BOT PLUS. www.botplusweb.portalfarma.com/[Afinitor] Cost obtained in 2016 (NWP)
Gemcitabine	0.04	BOT PLUS. www.botplusweb.portalfarma.com/[GEMCITABINA ACCORD EFG] Cost obtained in 2016 (NWP)
Ifosfamide (TRONOXAL)	0.03	BOT PLUS. www.botplusweb.portalfarma.com/[Tronoxal] Cost obtained in 2016 (NWP)
Imatinib (GLIVEC)	0.19	BOT PLUS. www.botplusweb.portalfarma.com/[Glivec] Cost obtained in 2016 (NWP)
Methotrexate	0.03	BOT PLUS. www.botplusweb.portalfarma.com/[METOTREXATO ACCORD EFG] Cost obtained in 2016 (NWP)
Paclitaxel	1.31	BOT PLUS. www.botplusweb.portalfarma.com/[PACLITAXEL ACCORD EFG] Cost obtained in 2016 (NWP)
Pazopanib (VOTRIENT)	0.11	BOT PLUS. www.botplusweb.portalfarma.com/[VOTRIENT] Cost obtained in 2016 (NWP)
Sunitinib (SUTENT)	3.37	BOT PLUS. www.botplusweb.portalfarma.com/[SUTENT] Cost obtained in 2016 (NWP)
Topotecan	20.38	BOT PLUS. www.botplusweb.portalfarma.com/[TOPOTECAN ACCORD EFG] Cost obtained in 2016 (NWP)
Trabectedin (YONDELIS)	1994	BOT PLUS. www.botplusweb.portalfarma.com/[YONDELIS] Cost obtained in 2016 (NWP)
Vincristine	2.84	BOT PLUS. www.botplusweb.portalfarma.com/[VINCRISTINA TEVA EFG] Cost obtained in 2016 (NWP)
Vinorelbine	0.63	BOT PLUS. www.botplusweb.portalfarma.com/[VINORELBINA SANDOZ EFG] Cost obtained in 2016 (NWP)
Systemic anticancer drug administration costsc	Cost for first administrations	Cost for subsequent administrations	Sources and assumptions
Cost per administration (by regimen)
Doxorubicin	259.93	259.93	Cost of chemotherapy per session of about 1h (111 €) + cost of nursering per chemotherapy administration for less than 2h (148.93 €); assumed same cost for subsequent administrations. Time per session and nursering obtained in www.cancercare.on.ca/. Costs obtained from OBLIKUE (2016)
Doxorubicin + ifosfamide mesna	704.93	704.93	Cost of chemotherapy per session of about 5h (556 €) + cost of nursering per chemotherapy administration for less than 2h (148.93 €); assumed same cost for subsequent administrations. Time per session and nursering obtained in www.cancercare.on.ca/. Costs obtained from OBLIKUE (2016)
Docetaxel + gemcitabine	259.93	482.93	Cost of chemotherapy per session less than 1h (111 €) on day one + cost of nursering per chemotherapy administration for less than 2h (148.93), and the cost of chemotherapy per session of about 3 hours on day 8 (334 €) + cost of nursering per chemotherapy administration for less than 2 h (148.93). Time per session obtained in www.cancercare.on.ca/. Costs obtained from OBLIKUE (2016)
Paclitaxel	370.93	370.93	Cost of chemotherapy per session of about 2h (222 €) + cost of nursering per chemotherapy administration for less than 2h (148.93 €); assumed same cost for subsequent administrations. Time per session and nursering obtained in www.cancercare.on.ca/. Costs obtained from OBLIKUE (2016)
Ifosfamide mesna	668	668	Ifosfamide split into multiple days: 6-7 hours. Cost is estimated per session of 6 hours in each patient visit (668 €). Assume the same costs in subsequent visits. Time per session obtained in www.cancercare.on.ca/. Cost obtained from OBLIKUE (2016)
Pazopanib	N/A	N/A	Oral chemotherapy does not have administration costs.
Trabectedin	148.93	148.93	Nursing workload less than 2h (148.93 €). Assumed same cost for subsequent administrations. Nursing time obtained in www.cancercare.on.ca/. Costs obtained from OBLIKUE (2016)
Dacarbazine + gemcitabine	259.93	482.93	Assumed the same cost for administration of docetaxel + gemcitabine, because dacarbazine is given as an IV injection or (for doses above 200 mg/m2) as a slow IV infusion (over 15-30 minutes) (based on section 4.2: https://www.medicines.org.uk/emc/medicine/1088).
Other oral anticancer drugs (i.e., crizotinib, everolimus, imatinib, sunitinib)	N/A	N/A	Oral chemotherapy does not have administration costs.
Other non-oral anticancer drugs	148.93	148.93	Assumed the same cost for administration of trabectedin (i.e., nursing workload less than 2h [148.93 €]. Assumed same cost for subsequent administrations. Nursing time obtained in www.cancercare.on.ca/. Costs obtained from OBLIKUE [2016])
Health care visit costs	Cost	Sources and assumptions
Outpatient visits (cost per visit)
Outpatient office visits	168.88	OBLIKUE 2016 (Oncología:Primera Consulta). Cost updated to 2016. Following visits will cost 101.33 € (same source).
Outpatient hospital clinic visits	411.88	OBLIKUE 2016 (Hospital de día oncológico). Cost updated to 2016.
Outpatient palliative care visits	81.27	OBLIKUE 2016 (U. Cuidados paliativos:Primera Consulta ). Cost updated to 2016. Following visits will cost 48.76 €.
Emergency department (ED) visits	165.92	OBLIKUE 2016 [Visita Urgencias (General)]. Cost updated to 2016.
Inpatient hospitalizations (cost per day)
By ward
General/medical ward, oncology ward, or other/unknown ward for hospitalizations for treatment-related procedures (e.g., surgery, radiotherapy)	1030.13	OBLIKUE 2016 [Estancia hospitalaria + primera intervención quirúrgica] Assumed the daily cost of an elective inpatient stay with a single intervention (surgery)
General/medical ward, oncology ward, or other/unknown ward for hospitalizations not for treatment-related procedures	771.85	OBLIKUE 2016 [Estancia hospitalaria, por día] Assumed the daily cost of an elective inpatient stay without interventions
Intensive care unit (cost per episode)	1531.13	OBLIKUE 2016; MIV-Medicina Intensiva (coste/día estancia media) Cost per day in the intensive care unit.
Inpatient end-of-life care
Long-term care facility (cost per day)	263	Assumed the same cost per day as for hospice.
Hospice (one-time cost)	2814.1	OBLIKUE 2016. [Estancia, hospital cuidados paliativos grupo M-L (media-larga estancia)]. Cost updated to 2016. Assumed the average cost per day in an inpatient hospice unit, with daily cost applied to an assumed 10.7 day length of stay (based on Gomez-Batiste et al. 2006)
Supportive care costs	Cost per unite	Unit	Sources and assumptions
Pain control
Opiate analgesics	0.03	Day	BOT PLUS (2016); Assumed 5 mg methadone daily during the full line of therapy or period following end of last therapy (based on 'Methadone as first-line opioid treatment for cancer pain in a developing country palliative care unit' [Peirano et al., 2016])
Other analgesics	0.16	Day	BOT PLUS (2016); Assumed 1,000 mg paracetamol taken 4 times daily during the full line of therapy or period following end of last therapy (based on common analgesics for pain in patients with lung cancer [Simmons et al., 2012])
Radiotherapy	647.98	One-time cost	Cost updated to 2016. OBLIKUE (Consulta externa Radioterapia con acelerador lineal. Grupo I. Paliativo sencillo, proceso completo)
Psychological intervention	415.44	One-time cost	Cost updated to 2016. OBLIKUE (Consulta psicología, primera). Consellería de Sanidad (2014) Decreto 56/2014, de 30 de abril. Diario Oficial de Galicia nº 96 pág. 22788, de 21 de mayo de 2014. Assumed weekly visits for 6 weeks.
Sedation for refractory pain	0.11	One-time cost	BOT PLUS (2016); Assumed 3.5 mg Midazolam (based on 'Palliative Sedation in Patients With Cancer' [Maltoni and Setola, 2015]). Midazolan dose was obtained from the Spanish SmPC (dose of 3.5 mg per inyeccion)
Epidural infusions	86.82	One-time cost	Cost updated to 2016. OBLIKUE (Analgesia epidural)
Splanchnic nerve block	--	--	--
Other	--	--	--
Antiemetics	43.32	Cycle	BOT PLUS (2016); Assumed 16 mg ondansetron taken daily for 5 days per cycle of chemotherapy (based on ESMO guidelines for the prevention of chemotherapy- and radiotherapy-induced nausea and vomiting [Roila et al., 2010])
Antibiotics	8.4	One-time course	BOT PLUS (2016); Assumed 500 mg of levofloxacin once daily for 7 days (based on clinical trial by Cullen et al. (2005) that investigated antibacterial prophylaxis after chemotherapy for solid tumors and lymphomas)
Antifungals	5.49	Day	BOT PLUS (2016); Assumed 400 mg fluconazole taken daily during the full line of therapy or period following end of last therapy (based on clinical trial from Winston et al. [2000] that investigated antifungal therapy of febrile neutropenic patients with cancer)
Antivirals	20.22	One-time course	BOT PLUS (2016); Assumed 75 mg oseltamivir taken twice daily for 5 days, assuming cost to treat viral infection of influenza
Dexrazoxane	--	--	--
Transfusions
Red blood cell transfusion	36.35	One-time cost	Cost updated to 2016. OBLIKUE (Transfusión de concentrado de eritrocitos); cost per unit of blood transfused.
Platelet transfusion	163.83	One-time cost	Cost updated to 2016. OBLIKUE (Transfusión de concentrado de plaquetas desleucotizado)
Other	--	--	--
Antianxiety, antidepressant drugs	2	One-time course	BOT PLUS (2016); Assumed 20 mg fluoxetine taken daily for 5 weeks (Riblet et al., 2014)
Growth factors
WBC growth factors	0.57	Cost per kg per day	BOT PLUS (2016); Assumed 5 µg/kg of filgrastim per day for 7 days for each cycle during the line of therapy in which the patient was reported to receive growth factors, or for a total of up to 7 days in the period following end of last therapy if the patient was reported to receive growth factors during this time
Erythropoiesis stimulating agents	175.35	Week	BOT PLUS (2016); Assumed 30,000 IU epoetin beta weekly for the line of therapy or period following end of last therapy if the patient was reported to receive growth factors during this time
Other	--	--	--
Bisphosphonates	15	Every 4 weeks	BOT PLUS (2016); Assumed 4 mg zoledronic acid taken every 4 weeks during the full line of therapy or period following end of last therapy (based on ESMO guidelines on bone health in cancer patients [Coleman et al., 2014])
Referral to psychiatrist, psychologist, or other professional for distress management	415.44	One-time cost	Cost updated to 2016. OBLIKUE (Consulta psicología, primera). Consellería de Sanidad (2014) Decreto 56/2014, de 30 de abril. Diario Oficial de Galicia nº 96 pág. 22788, de 21 de mayo de 2014. Assumed weekly visits for 6 weeks.
Oxygen	3.57	Day	OBLIKUE (2016). Oxigenoterapia con concentradores (domicilio)
Radiation therapy, excluding utilization for pain control	137.55	One-time cost	OBLIKUE (2016). Oncología radioterápica:Primera Consulta
Nutritional support	455.9	One-time cost	OBLIKUE (2016). Colocación sonda alimentación enteral
Corticosteroids, excluding utilization for pain control	0.38	Day	BOT PLUS (2016); Assumed 6 mg dexamethasone taken daily during the full line of therapy or period following end of last therapy (Simmons et al., 2012)
Tests as part of supportive care
Computed tomography (CT) scan	377.36	One-time cost	OBLIKUE (2016). Tomografía computerizada (TC) con o sin contraste
Positron emission tomography (PET) scan (whole body)	727.46	One-time cost	OBLIKUE (2016). Estudio Tomografía por emisión de positrones (PET) cuerpo completo
GI endoscope	68.59	One-time cost	OBLIKUE (2016). Endoscopia digestiva
Magnetic Resonance Imaging (MRI)	443.49	One-time cost	OBLIKUE (2016). Resonancia magnética (RMN/RMI) simple
a Costs are in 2016 euros and were inflated when necessary using the indice de precios de consumo, medicina (INEbase, 2016).
b Systemic anticancer drug costs were obtained from BOT PLUS (www.botplusweb.portalfarma.com) and are reported as costs per mg, unless otherwise noted. To estimate anticancer drug costs, the drug formulation with the lowest cost per milligram was selected, assuming no wastage. Physicians were assumed to have reported the initial dose per administration for each anticancer agent within a given reg…
c Systemic anticancer drug administration costs were obtained from OBLIKUE ( E-Salud. Spanish Health Costs Database [2016] Oblikue Consulting. Available at: http://www. oblikue.com/bddcostes/. Accessed: April 2016) assuming administration in an outpatient setting. Regimen-specific administration costs were determined for the top five regimens in first-line through third-line therapy. For all othe…
e Supportive care drug costs were obtained from BOT PLUS (www.botplusweb.portalfarma.com) for a representative cost of the dose/drug noted.
References:
BOT PLUS. 2016. Available at: www.botplusweb.portalfarma.com.
Coleman R, Body JJ, Aapro M, Hadji P, Herrstedt J; ESMO Guidelines Working Group. Bone health in cancer patients: ESMO Clinical Practice Guidelines. Ann Oncol. 2014 Sep;25 Suppl 3:iii124-37.
Cullen M, Steven N, Billingham L, Gaunt C, Hastings M, Simmonds P, et al. Antibacterial prophylaxis after chemotherapy for solid tumors and lymphomas. N Engl J Med. 2005 Sep 8;353(10):988-98.
Gómez-Batiste X, Tuca A, Corrales E, Porta-Sales J, Amor M, Espinosa J, et al. Resource consumption and costs of palliative care services in Spain: a multicenter prospective study. J Pain Symptom Manage. 2006 Jun;31(6):522-32.
INEbase. Indice de precios de consumo, medias anuales (base 2011): medicina. Available at: http://www.ine.es/en/fmi/nsdp_en.htm.
Maltoni M, Setola E. Palliative Sedation in Patients With Cancer. Cancer Control. 2015 Oct;22(4):433-41.
OBLIKUE. E-Salud. Spanish Health Costs Database. 2016. Oblikue Consulting. Available at: http://www. oblikue.com/bddcostes/.
Peirano GP, Mammana GP, Bertolino MS, Pastrana T, Vega GF, Russo J, et al. Methadone as first-line opioid treatment for cancer pain in a developing country palliative care unit. Support Care Cancer. 2016 Aug;24(8):3551-6.
Riblet N, Larson R, Watts BV, Holtzheimer P. Reevaluating the role of antidepressants in cancer-related depression: a systematic review and meta-analysis. Gen Hosp Psychiatry. 2014 Sep-Oct;36(5):466-73.
Roila F, Herrstedt J, Aapro M, Gralla RJ, Einhorn LH, Ballatori E, et al.; ESMO/MASCC Guidelines Working Group. Guideline update for MASCC and ESMO in the prevention of chemotherapy- and radiotherapy-induced nausea and vomiting: results of the Perugia consensus conference. Ann Oncol. 2010 May;21 Suppl 5:v232-43.
Simmons CP, Macleod N, Laird BJ. Clinical management of pain in advanced lung cancer. Clin Med Insights Oncol. 2012;6:331-46.
Winston DJ, Hathorn JW, Schuster MG, Schiller GJ, Territo MC. A multicenter, randomized trial of fluconazole versus amphotericin B for empiric antifungal therapy of febrile neutropenic patients with cancer. Am J Med. 2000 Mar;108(4):282-9.

## Sheet: S3. Germany Unit Costs
Supplementary Table 3. Unit Costs Related to Treatment of Advanced STS: Germanya
Systemic anticancer drug acquisition costs	Cost per mgb	Sources and assumptions
Carboplatin	0.528	LauerTaxe 18/07/2016
Cisplatin	0.72054	LauerTaxe 18/07/2016
Crizotinib	0.40585	LauerTaxe 18/07/2016
Dacarbazine	0.151805	LauerTaxe 18/07/2016
Docetaxel	8.62	LauerTaxe 18/07/2016
Doxorubicin	2.04365	LauerTaxe 18/07/2016
Epirubicin	2.8039	LauerTaxe 18/07/2016
Gemcitabine	0.120895	LauerTaxe 18/07/2016
Ifosfamide	0.03415	LauerTaxe 18/07/2016
Paclitaxel	1.35547	LauerTaxe 18/07/2016
Pazopanib	0.17899	LauerTaxe 18/07/2016
Topotecan	70.1725	LauerTaxe 18/07/2016
Trabectedin	2345.88	LauerTaxe 18/07/2016
Vinorelbine	0.286662	LauerTaxe 18/07/2016
Systemic anticancer drug administration costsc	Cost for first administrations	Cost for subsequent administrationsd	Sources and assumptions
Cost per administration (by regimen)
Doxorubicin	281.21	0	Kassenärztliche Vereinigung Nordrhein (2016); cost to deliver parenteral chemotherapy at first attendance (Code 86512 + 86516 - oncology agreement).
Doxorubicin + ifosfamide mesna	281.21	0
Docetaxel + gemcitabine	281.21	0
Paclitaxel	281.21	0
Dacarbazine + ifosfamide mesna	281.21	0
Ifosfamide mesna	281.21	0
Pazopanib	60	N/A	Kassenärztlichen Vereinigung Sachsen (2008); cost to deliver exclusively oral chemotherapy (BMÄ. E-GO 96505 - regional oncological agreement); assumed cost applied once per cycle.
Trabectedin	281.21	0	Kassenärztliche Vereinigung Nordrhein (2016); cost to deliver parenteral chemotherapy at first attendance (Code 86512 + 86516 - oncology agreement).
Dacarbazine + vinorelbine	281.21	0
Gemcitabine + paclitaxel	281.21	0
Other oral anticancer drugs (i.e., crizotinib)	60	N/A	Kassenärztlichen Vereinigung Sachsen (2008); cost to deliver exclusively oral chemotherapy (BMÄ. E-GO 96505 - regional oncological agreement); assumed cost applied once per cycle.
Other non-oral anticancer drugs	281.21	0	Kassenärztliche Vereinigung Nordrhein (2016); cost to deliver parenteral chemotherapy at first attendance (Code 86512 + 86516 - oncology agreement).
Health care visit costs	Cost	Sources and assumptions
Outpatient visits (cost per visit)
Outpatient office visits	28.545	Einheitlicher Bewertungsmaßstab (EbM, 2016); assumed average cost of a general practitioner visit among patients aged 55-75 years (assured flat rate + consultation [EbM Codes 03000 and 01436]) and an oncologist visit among patients aged 60 years and older (assured flat rate + additional oncological fees [EbM Codes 13494 and 13496])
Outpatient hospital clinic visits	52.39	EbM (2016); assumed cost of 2 hours of observation and care during a visit for parenteral treatment with cytostatics (EbM Code 01510)
Outpatient palliative care visits	32.97	EbM (2016); assumed cost of an outpatient palliative care general practitioner visit among patients aged 55-75 years (EbM Codes 03000 [€16.38] and 03371 [€16.59])
Emergency department (ED) visits	32.4651	Deutsche Gesellschaft interdisziplinäre Notfall- und Akutmedizin e. V. (DGINA) (2015); based on estimated costs of outpatient ED visits, which are not included in DRG codes on an outpatient basis (costs inflated from 2012 to 2016 euros)
Inpatient hospitalizations (cost per day)
By ward
General/medical ward, oncology ward, or other/unknown ward for hospitalizations for treatment-related procedures (e.g., surgery, radiotherapy)	800.195	Institut für das Entgeltsystem im Krankenhaus (InEK, 2016); assumed weighted average cost of hospitalizations using specific DRG codes related to soft tissue sarcoma.
General/medical ward, oncology ward, or other/unknown ward for hospitalizations not for treatment-related procedures	446.3	Institut für das Entgeltsystem im Krankenhaus (InEK, 2016); assumed weighted average cost of hospitalizations using specific DRG codes related to soft tissue sarcoma.
Intensive care unit (cost per episode)	-	Separate costs for stays in intensive care units are not available in Germany, as these costs are already included in the DRG costs above.
Inpatient end-of-life care (cost per day)
Long-term care facility	67.9401	Statistisches Bundesamt (2016a); assumed the cost per day for care level I (out of 0-III possible care levels); available at: https://www.destatis.de/DE/Publikationen/Thematisch/Gesundheit/Pflege/LaenderPflegeheime5224102139004.pdf?__blob=publicationFile
Ambulatory home care	23.7333	BMG (2016a; 2016b); assumed the cost per day for care level I (out of I-III possible care levels); http://www.bmg.bund.de/online-ratgeber-zur-pflege/leistungen-der-pflegeversicherung/die-leistungen-im-ueberblick.html (nursing allowance) + http://www.bmg.bund.de/themen/pflege/leistungen/ambulante-pflege/pflegesachleistungen.html (so-called benefit-in-kind)
Hospice	261.45	§39a SGB V in connection with §18 (1) SGB IV (average gross income €34.860/12 months * 9%)
Supportive care costs	Cost per unite	Unit	Sources and assumptions
Pain control
Opiate analgesics	2.854	Day	Lauer Taxe (2016); assumed 30 mg codeine phosphate taken 4 times daily during the full line of therapy or period following end of last therapy (based on common analgesics for pain in patients with lung cancer [Simmons et al., 2012])
Other analgesics	0.46	Day	Lauer Taxe (2016); assumed 1,000 mg paracetamol (paracetamol AL 1000) taken 4 times daily during the full line of therapy or period following end of last therapy (based on common analgesics for pain in patients with lung cancer [Simmons et al., 2012])
Radiotherapy	212.17	One-time cost	EbM (2016); assumed cost of planning (EbM Code 25341) and cost to administer a fraction of radiotherapy (EbM Code 25321)
Psychological intervention	512.82	One-time cost	EbM (2016); assumed weekly visits for 6 weeks, using the cost of counselling per 50 minute session (EbM Code 30932)
Sedation for refractory pain	--	--	--
Epidural infusions	--	--	--
Splanchnic nerve block	--	--	--
Other	--	--	--
Antiemetics	41.56	Cycle	Lauer Taxe (2016); assumed 16 mg ondansetron taken daily for 5 days per cycle of chemotherapy (based on ESMO guidelines for the prevention of chemotherapy- and radiotherapy-induced nausea and vomiting [Roila et al., 2010])
Antibiotics	10.437	One-time course	Lauer Taxe (2016); assumed 500 mg of levofloxacin once daily for 7 days (based on clinical trial by Cullen et al. (2005) that investigated antibacterial prophylaxis after chemotherapy for solid tumors and lymphomas)
Antifungals	10.0508	Day	Lauer Taxe (2016); assumed 400 mg fluconazole taken daily during the full line of therapy or period following end of last therapy (based on clinical trial from Winston et al. [2000] that investigated antifungal therapy of febrile neutropenic patients with cancer)
Antivirals	32.66	One-time course	Lauer Taxe (2016); assumed 75 mg oseltamivir taken twice daily for 5 days, assuming cost to treat viral infection of influenza
Dexrazoxane	--	--	--
Transfusions
Red blood cell transfusion	22.12	One-time cost	EbM (2016); assumed cost of first transfusion (EbM Code 02110)
Platelet transfusion	22.12	One-time cost	EbM (2016); assumed cost of first transfusion (EbM Code 02110)
Other	--	--	--
Antianxiety, antidepressant drugs	21.91	One-time course	Medpex.de (2016); assumed 20 mg fluoxetine taken daily for 5 weeks (Riblet et al., 2014)
Growth factors
WBC growth factors	9.56677	Cost per kg per day	Lauer Taxe (2016); assumed 5 µg/kg of filgrastim per day for 7 days for each cycle during the line of therapy in which the patient was reported to receive growth factors, or for a total of up to 7 days in the period following end of last therapy if the patient was reported to receive growth factors during this time
Erythropoiesis stimulating agents	--	--	--
Other	--	--	--
Bisphosphonates	142.33	Every 4 weeks	Lauer Taxe (2016); assumed 4 mg zoledronic acid taken every 4 weeks during the full line of therapy or period following end of last therapy (based on ESMO guidelines on bone health in cancer patients [Coleman et al., 2014])
Referral to psychiatrist, psychologist, or other professional for distress management	512.82	One-time cost	EbM (2016); assumed weekly visits for 6 weeks, using the cost of counselling per 50 minute session (EbM Code 30932)
Oxygen	1.46	Day	EbM (2016; Code 02500)
Radiation therapy, excluding utilization for pain control	212.17	One-time cost	EbM (2016); assumed cost of planning (EbM Code 25341) and cost to administer a fraction of radiotherapy (EbM Code 25321)
Nutritional support	146.52	One-time cost	EbM (2016); assumed the cost of observation and care of patients with enteral nutrition (EbM Code 01512)
Corticosteroids, excluding utilization for pain control	1.1935	Day	Rote Liste (2016); assumed 6 mg dexamethasone taken daily during the full line of therapy or period following end of last therapy (Simmons et al., 2012)
Tests as part of supportive care
Computed tomography (CT) scan	68.88	One-time cost	EbM (2016); assumed the cost of chest CT scan without contrast (EbM Code 34330)
Positron emission tomography (PET) scan (whole body)	786.89	One-time cost	Gebührenordnung für Ärzte (2016); available at: http://www.e-bis.de/goae/defaultFrame.htm
GI endoscope	87.14	One-time cost	EbM (2016; Code 13400)
Magnetic Resonance Imaging (MRI)	126.59	One-time cost	EbM (2016); assumed the cost of MRI without contrast (EbM Code 34410, 34411, 34430, 34441 or 34442)
Multi Gated Acquisition Scan (MUGA)	110.52	One-time cost	EbM (2016); assumed the cost of MUGA without contrast (EbM Code 34475, 34480, 34485, 34486, 34489 or 34490)
a Costs are in 2015/2016 euros and were inflated when necessary using the relevant inflation index (Statistisches Bundesamt, 2016b).
b Systemic anticancer drug costs were obtained from LauerTaxe (2016) and represent the net cost for the sick fund. To estimate anticancer drug costs, the drug formulation with the lowest cost per milligram was selected, assuming no wastage. Physicians were assumed to have reported the initial dose per administration for each anticancer agent within a given regimen. Patient-specific systemic treat…
c Systemic anticancer drug administration costs were obtained from Kassenärztliche Vereinigung Nordrhein (2016; available at: https://www.kvno.de/downloads/vertraege/uebersicht_symbolnummern.pdf) and Kassenärztlichen Vereinigung Sachsen (2008; available at: http://www.kvs-sachsen.de/fileadmin/img/Mitglieder/mitteilungen/2008-09/onkolog.pdf), assuming administration in an outpatient setting. Regim…
d Systemic anticancer drug administration costs for subsequent administrations of non-oral regimens were assumed to be 0€ because administration costs were only able to be applied once per quarter.
e Supportive care drug costs were obtained from LauerTaxe (2016) or Medpex.de for a representative cost of the dose/drug noted.
References:
Bundesministerium für Gesundheit (BMG). 2016a. Available at: http://www.bmg.bund.de/online-ratgeber-zur-pflege/leistungen-der-pflegeversicherung/die-leistungen-im-ueberblick.html.
Bundesministerium für Gesundheit (BMG). 2016b. Available at: http://www.bmg.bund.de/themen/pflege/leistungen/ambulante-pflege/pflegesachleistungen.html.
Coleman R, Body JJ, Aapro M, Hadji P, Herrstedt J; ESMO Guidelines Working Group. Bone health in cancer patients: ESMO Clinical Practice Guidelines. Ann Oncol. 2014 Sep;25 Suppl 3:iii124-37.
Cullen M, Steven N, Billingham L, Gaunt C, Hastings M, Simmonds P, et al. Antibacterial prophylaxis after chemotherapy for solid tumors and lymphomas. N Engl J Med. 2005 Sep 8;353(10):988-98.
Gebührenordnung für Ärzte. 2016. Available at: http://www.e-bis.de/goae/defaultFrame.htm.
Kassenärztliche Vereinigung Nordrhein. 2016. Available at: https://www.kvno.de/downloads/vertraege/uebersicht_symbolnummern.pdf.
Kassenärztlichen Vereinigung Sachsen. 2008. Available at: http://www.kvs-sachsen.de/fileadmin/img/Mitglieder/mitteilungen/2008-09/onkolog.pdf.
Riblet N, Larson R, Watts BV, Holtzheimer P. Reevaluating the role of antidepressants in cancer-related depression: a systematic review and meta-analysis. Gen Hosp Psychiatry. 2014 Sep-Oct;36(5):466-73.
Roila F, Herrstedt J, Aapro M, Gralla RJ, Einhorn LH, Ballatori E, et al.; ESMO/MASCC Guidelines Working Group. Guideline update for MASCC and ESMO in the prevention of chemotherapy- and radiotherapy-induced nausea and vomiting: results of the Perugia consensus conference. Ann Oncol. 2010 May;21 Suppl 5:v232-43.
Rote Liste. 2016. Available at: http://online.rote-liste.de/suche/praep/.
Simmons CP, Macleod N, Laird BJ. Clinical management of pain in advanced lung cancer. Clin Med Insights Oncol. 2012;6:331-46.
Statistisches Bundesamt. 2016a. Available at: https://www.destatis.de/DE/Publikationen/Thematisch/Gesundheit/Pflege/LaenderPflegeheime5224102139004.pdf?__blob=publicationFile.
Statistisches Bundesamt. Verbraucherpreisindizes 1992-2015. 2016b. Available at: https://www.destatis.de/DE/ZahlenFakten/GesamtwirtschaftUmwelt/Preise/Verbraucherpreisindizes/Tabellen_/VerbraucherpreiseKategorien.html.
Winston DJ, Hathorn JW, Schuster MG, Schiller GJ, Territo MC. A multicenter, randomized trial of fluconazole versus amphotericin B for empiric antifungal therapy of febrile neutropenic patients with cancer. Am J Med. 2000 Mar;108(4):282-9.

## Sheet: S4. France Unit Costs
Supplementary Table 4. Unit Costs Related to Treatment of Advanced STS: Francea
Systemic anticancer drug acquisition costs	Cost per mg		Sources and assumptions
Carboplatin	N/A		None of the systemic anticancer drugs reported in this study required extra-DRG. Therefore, most drug costs in France are included within the administration costs provided below and are not accounted for separately. The exception is pazopanib, which has a special temporary funding scheme different from usual reimbursement (2,628.9€ for 400 mg, 60 tablets) (Base des Médicaments et Informations Tar…
Cisplatin	N/A
Cyclophosphamide	N/A
Dacarbazine	N/A
Dactinomycin	N/A
Docetaxel	N/A
Doxorubicin	N/A
Doxorubicin (pegylated liposomal)	N/A
Epirubicin	N/A
Etoposide	N/A
Everolimus	N/A
Gemcitabine	N/A
Ifosfamide	N/A
Imatinib	N/A
Methotrexate	N/A
Oxaliplatin	N/A
Paclitaxel	N/A
Pazopanib	0.109538
Regorafenib	N/A
Sorafenib	N/A
Sunitinib	N/A
Temozolomide	N/A
Trabectedin	N/A
Vinblastine	N/A
Vincristine	N/A
Vinorelbine	N/A
Systemic anticancer drug administration costsb	Cost for first administrations	Cost for subsequent administrations	Sources and assumptions
Cost per administration (by regimen)
Doxorubicin	355.42	355.42	Source: ATIH. For oral anticancer drugs, assumed cost applied once per cycle.
Doxorubicin + ifosfamide mesna	355.42	355.42
Epirubicin + ifosfamide mesna	355.42	355.42
Trabectedin	355.42	355.42
Paclitaxel	355.42	355.42
Pazopanib	0	N/A
Docetaxel + gemcitabine	355.42	355.42
Ifosfamide mesna	355.42	355.42
Gemcitabine	355.42	355.42
Other oral anticancer drugs (i.e., everolimus, imatinib, oxaliplatin, sunitinib)	355.42	N/A
Other non-oral anticancer drugs	355.42	355.42
Health care visit costs	Cost	Sources and assumptions
Outpatient visits (cost per visit)
Outpatient office visits	29.18	Source: "Assurance maladie" data.
Outpatient hospital clinic visits	29.18	Source: "Assurance maladie" data.
Outpatient palliative care visits	839	Assumed DRG for Palliative care, very short stay; GHM Code: 23Z02T Public Hospital: N=4473 ; Median Duration of Stay=0 ; Mean cost=839€ ; SD=190€ ; IC95%=[459€ ; 1219€] Private Hospital: N=NA; Median Duration of Stay=NA; Mean cost=NA; SD=NA; IC95%=[NA ; NA] Source : GHM v11g , January 2016
Emergency department (ED) visits	73.605	Assumed the average cost of hospital-specific GP/specialist visits using multiple sources, applying a supplement for when the patient is not hospitalized (Centre Hospitalier d’Argenteuil, 2015 available at http://www.ch-argenteuil.com/affiche_tarifs_sau.pdf; Hôpitaux Universitaires, La Pitié salpêtrière - Charles Foix Tarifs do consultation available at http://pitiesalpetriere.aphp.fr/tarifs-de-c…
Inpatient hospitalizations (cost per day)
By ward
General/medical ward, oncology ward, or other/unknown ward for hospitalizations for treatment-related procedures (e.g., surgery, radiotherapy)	734.921	Weighted average. Assumed DRGs for Palliative cares: Interventions for soft tissue malignancies, (comorbidities) level 1; GHM Code: 08C291 Public Hospital: N=781 ; Median Duration of Stay=4.8 ; Mean cost=3406€ ; SD=208€ ; IC95%=[2989€ ; 3822€] Private Hospital: N=NA; Median Duration of Stay=NA; Mean cost=NA; SD=NA; IC95%=[NA ; NA] Non minor interventions on soft tissue, level 1; GHM Code: 08C421 …
General/medical ward, oncology ward, or other/unknown ward for hospitalizations not for treatment-related procedures	626.25	Assumed DRG for Palliative cares: Primary tumour of bone, joint or soft tissue, level 1; GHM Code: 08M241 Public Hospital: N=409 ; Median Duration of Stay=4.0 ; Mean cost=2505€ ; SD=244 ; IC95%=[2018€ ; 2993€] Private Hospital: N=NA; Median Duration of Stay=NA; Mean cost=NA; SD=NA; IC95%=[NA ; NA] Source : GHM v11g , January 2016
Intensive care unit (cost per episode)	357.68	ICU daily supplement added to relevant DRG above. This daily cost is 401.07€ for public hospital and 314.29€ for private hospital. Source : JORF n°0057 du 08/03/2016 texte n° 39
Inpatient end-of-life care (cost per day)
Unités de soins longue durée (USLD) (long-term care, excluding centre de soins de fin de vie)	249.8	Assumed DRG for Bones and soft tissue malignancies, level 1 (with comorbidities); GME Code: 0821a1 Public Hospital: N=1067 ; Median Duration of Stay=32.6 ; Mean cost (daily)=249.80€ ; SD=NA€ ; IC95%=[24.5€ ; 475.0€] Private Hospital: N=NA; Median Duration of Stay=NA ; Mean cost=NA€ ; SD=NA€ ; IC95%=[NA ; NA] Source : ENCC 2010 SSR , 6 January 2014
Unités de soins palliatifs (hospice care, excluding centre de soins de fin de vie)	453.881	Weighted average. Assumed DRG for Palliative cares; GHM Code: 23Z02Z Public Hospital: N=60073 ; Median Duration of Stay=17.4 ; Mean cost=8344€ ; SD=461€ ; IC95%=[7423€ ; 9266€] Private Hospital: N=18069 ; Median Duration of Stay=17.5 ; Mean cost=6450€ ; SD=294€ ; IC95%=[5862€ ; 7037€] Source : GHM v11g , January 2016
Centre de soins de fin de vie (excluding unités de soins longue durée [USLD] and unités de soins palliatifs)	453.881	Assumed the same cost as for unités de soins palliatifs (hospice care).
Supportive care costs	Cost per unitc	Unit	Sources and assumptions
Pain control
Opiate analgesics	0.315	Day	Assumed 500 mg/30 mg paracetamol codeine taken 4 times a day (codeine phosphate is not available in France alone, and is combined with paracetamol). Price of the generic drug 500 mg/30 mg is 1.26€ a 16 tablets pack. Source: National Health Insurance, Base des Medicaménts et Informations Tarifaires, v991, 04/05/2016, accessed 09/05/2016
Other analgesics	0.38	Day	Assumed 1g paracetamol taken 4 times a day. Price of the generic drug is 0.76€ a 8 x 1000 mg pack. Source: National Health Insurance, Base du Medicament Informations Tarifaires, v992, 10/05/2016, accessed 17/05/2016
Radiotherapy	222.65	One-time cost	Source: CCAM, GHM and ENCC MCO 2013.
Psychological intervention	222	One-time cost	Assumed weekly visits for 6 weeks. Only a consultation at the psychiatrist is reimbursed by the National Health Insurance. Any other professional consultation won't be reimbursed, and therefore there is no regulation on the price of psychotherapist or psychologist consultations. Source : National Health Insurance (accessed 09/05/2016)
Sedation for refractory pain	0.858375	One-time cost	Assumed Buccolam (Midazolam) 10 mg in a 4x2ml pack. Based on recommendations from the French society of palliative care (http://www.sfap.org/system/files/sedation-phase-terminale.pdf). Source: National Health Insurance, Base des Médicaments et Informations Tarifaires, v993, 20/05/2016, accessed 26/05/2016
Epidural infusions	0.858375	One-time cost
Splanchnic nerve block	0.858375	One-time cost
Other	--	--	--
Antiemetics	34.05	Cycle	Assumed 16 mg ondansetron taken daily for 5 days per cycle of chemotherapy. Ondansetron 8 mg is 6.81€ a 2 tablets pack. Source: National Health Insurance, Base des Medicaménts et Informations Tarifaires, v991, 04/05/2016, accessed 09/05/2016
Antibiotics	10.36	One-time course	Assumed 500 mg of levofloxacin once daily for 7 days. levofloxacin 500 mg is 7.40€ a 5 tablets pack. Source: National Health Insurance, Base des Medicaménts et Informations Tarifaires, v991, 04/05/2016, accessed 09/05/2016
Antifungals	8.01867	Day	Assumed 400 mg fluconazole taken daily during the full line of therapy. Fluconazole 200 mg is 29.72€ a 7 caplets pack or 120.28€ a 30 caplets pack. Source: National Health Insurance, Base des Medicaménts et Informations Tarifaires, v991, 04/05/2016, accessed 09/05/2016
Antivirals	--	--	--
Dexrazoxane	124.8	Cost per m2 per administration	Assumed 600 mg/m2 administered with doxorubicin. Source: JORF.
Transfusions
Red blood cell transfusion	379.54	One-time cost	Assumed cost of two units of blood transfused. Price per red blood cell unit: 189.77€. Source : JORF n°0298 du 24/12/2015 page 23927 texte n° 54
Platelet transfusion	154.88	One-time cost	Assumed cost of two units transfused. Price per platelet unit : 77.44€ (concentration 1x1011). Source : JORF n°0298 du 24/12/2015 page 23927 texte n° 54
Other	--	--	--
Antianxiety, antidepressant drugs	8.95	One-time course	Assumed 20 mg prozac taken daily for 5 weeks. Prozac 20 mg is 7.16€ per 28 tablets pack. Source: National Health Insurance, Base des Medicaménts et Informations Tarifaires, v991, 04/05/2016, accessed 09/05/2016
Growth factors
WBC growth factors	1.275	Cost per kg per day	Assumed 5 µg/kg of filgrastim per day for 7 days for each cycle during the line of therapy. Ratiograstim 300 µg/0.5 ml is 76.50€ per 1 seringe pack. Source: National Health Insurance, Base des Medicaménts et Informations Tarifaires, v991, 04/05/2016, accessed 09/05/2016
Erythropoiesis stimulating agents	182.102	Week	Assumed 30,000 UI epoetin beta weekly. Neorecormon 30,000 UI is 221.13€ a 1 seringe pack or 728.41€ a 4 seringes pack. Source: National Health Insurance, Base des Medicaménts et Informations Tarifaires, v991, 04/05/2016, accessed 09/05/2016
Other	--	--	--
Bisphosphonates	100.29	Every 4 weeks	Assumed 4 mg zoledronic acid taken every 4 weeks during the full line of therapy. Zolendronic acid 4mg is 100.29€ per pack. Source: National Health Insurance, Base des Medicaménts et Informations Tarifaires, v991, 04/05/2016, accessed 09/05/2016
Referral to psychiatrist, psychologist, or other professional for distress management	222	One-time cost	Assumed weekly visits for 6 weeks. Only a consultation at the psychiatrist is reimbursed by the National Health Insurance. Any other professional consultation won't be reimbursed, and therefore there is no regulation on the price of psychotherapist or psychologist consultations. 55.50€ if the consultation happens within 2 days after the referral. Source : National Health Insurance (accessed 09/05…
Oxygen	11	Day	Assumed the cost for portable oxygen therapy, as listed below. This weekly cost was converted to a daily cost. Forfait sous nom de marque : Oxygénothérapie long terme, déambulation : 77.00€ Source : National Health Insurance - Liste des produits et prestations, v411, 04/05/2016, accessed 10/05/2016 ; JORF n°0049 du 27 février 2015 page 3799 texte n° 119
Radiation therapy, excluding utilization for pain control	222.65	One-time cost	Source: CCAM, GHM and ENCC MCO 2013.
Nutritional support	29.18	One-time cost	Assumed the cost for an office visit to a specialist.
Corticosteroids, excluding utilization for pain control	0.67	Day	Assumed 6 mg dexamethasone taken daily. Dexamethasone phosphate 4 mg/ml is 1.34€ a 3 vials pack. Source: National Health Insurance, Base des Medicaménts et Informations Tarifaires, v991, 04/05/2016, accessed 09/05/2016
Tests as part of supportive care			Corresponding procedures in CCAM are not charged: CCAM Codes HSLD001, HSLD002, HSLF001, HSLF002, HSLF003 Source : National Health Insurance - CCAM v43 (Accessed 09/05/2016)
Computed tomography (CT) scan	51	One-time cost	Source: CCAM.
Positron emission tomography (PET) scan (whole body)	89.54	One-time cost	“Positron Emission Tomography (PET), full body, no location reported” (CCAM Code ZZQL016). This cost does not include any technical fees that may apply (i.e., technical fees that are set based on the type of PET scan used, its location, and the number of acts performed during a year). Source : National Health Insurance - CCAM v43 (Accessed 09/05/2016)
GI endoscope	--	--	--
Magnetic Resonance Imaging (MRI)	69	One-time cost	Assumed the cost of an MRI for parts of the body other than the upper or lower limb. This cost does not include any technical fees that may apply (i.e., technical fees that are set based on the type of MRI used, its location, and the number of acts performed during a year). Source : National Health Insurance - CCAM v43 (Accessed 09/05/2016)
Multi Gated Acquisition Scan (MUGA)	316.85	One-time cost	Source: CCAM.
a Costs are in 2015/2016 euros and were inflated when necessary using the relevant inflation index (Insee database, 2016).
b Systemic anticancer drug administration costs were obtained from ATIH. Regimen-specific administration costs were not available. To estimate total administration costs for each patient in a given line of therapy, the following equation was used: Total administration costs for the line of therapy = hospitalization costs (i.e., the number of hospitalizations for administration x unit cost for ful…
c Supportive care drug costs were obtained from Base des Médicaments et Informations Tarifaires (2016) for a representative cost of the dose/drug noted.
References:
Base des Médicaments et Informations Tarifaires. 2016. Available at http://www.codage.ext.cnamts.fr/codif/bdm_it//fiche/index_fic_medisoc.php?p_code_cip=3400949131631&p_site=AMELI.
Centre Hospitalier d’Argenteuil. 2015. Available at: http://www.ch-argenteuil.com/affiche_tarifs_sau.pdf.
Hôpitaux Universitaires, La Pitié salpêtrière - Charles Foix Tarifs do consultation. Available at: http://pitiesalpetriere.aphp.fr/tarifs-de-consultation/.
Hospices Civils de Lyon Tarifs des Consultations Externes. Available at http://www.chu-lyon.fr/web/attached_file/Affiche_tarifs_consult_2016.pdf?ComponentId=kmelia16&attachmentId=16827.

## Sheet: S5. UK HCRU
Supplementary Table 5. Health Care Resource Utilization From Diagnosis of Advanced Soft Tissue Sarcoma, Overall and by Line of Therapy: United Kingdom
Characteristic	Total		First line		Second line		Third line
	N	%	N	%	N	%	N	%
Patients receiving nth-line therapy	199	100	199	100	75	100	11	100
Outpatient Visits
Known number of outpatient visits, N (%)	165	82.91	165	82.91	63	84	10	90.91
At least one outpatient hospital visit, N (%)	164	99.39	163	98.79	63	100	10	100
Annual number of visits (among patients with at least 1 visit)
Mean (SD)	26.43	48.36	27.85	49.67	25.07	16.55	36.28	33.78
Median	19.82		21.11		19.72		21.28
IQR (Q1, Q3)	14.18	27.42	14.59	30	14.12	32.14	14.4	46.08
Range (min,max)	3.16	617.14	4.7	617.14	4.47	102.86	12	120
Known number of chemotherapy administration, N (%)	164	82.41	163	81.91	63	84	10	90.91
At least one chemotherapy administration, N (%)	162	98.78	161	98.77	61	96.83	10	100
Annual number of visits for chemotherapy administration (among patients with at least 1 visit)
Mean (SD)	18.13	23.82	19.13	24.17	17.96	8.01	19.64	16.34
Median	15.53		16.43		17.14		14.38
IQR (Q1, Q3)	11.93	18.44	12.34	20.29	13.42	20.21	11.93	18.7
Range (min,max)	2.57	308.57	4.5	308.57	4.47	51.43	1.96	60
At least one non-chemotherapy administration, N (%)	2		2		2		0
Outpatient Palliative care visits
Known number of outpatient palliative care visits, N (%)	104	52.26	103	51.76	46	61.33	7	63.64
At least one outpatient palliative care visit, N (%)	25	24.04	21	20.39	4	8.7	0	0
Annual number of visits (among patients with at least 1 visit)
Mean (SD)	5.21	6.01	5.94	6.39	7.64	7.58
Median	3.96		4.59		6.33
IQR (Q1, Q3)	2.05	5.26	2.48	7.5	1.56	13.71
Range (min,max)	0.64	29.19	1.25	29.19	0.75	17.14
Known number of chemotherapy administration, N (%)	25	12.56	21	10.55	4	5.33	0	0
At least one chemotherapy administration, N (%)	6	24	5	23.81	1	25	0
Annual number of visits for chemotherapy administration (among patients with at least 1 visit)
Mean (SD)	7.02	6.81	8.82	6.67	2.37
Median	4.39		8.23		2.37
IQR (Q1, Q3)	1.25	14.59	3.53	14.59	2.37	2.37
Range (min,max)	1.02	16.49	1.25	16.49	2.37	2.37
At least one non-chemotherapy administration, N (%)	19		16		3		0
Outpatient nurse visits
Known number of outpatient nurse visits, N (%)	96	48.24	95	47.74	45	60	7	63.64
At least one outpatient nurse visit, N (%)	47	48.96	39	41.05	19	42.22	5	71.43
Number of visits (among patients with at least 1 visit)
Annual number of visits (among patients with at least 1 visit)
Mean (SD)	5.71	3.6	7.14	4.3	8.6	5.4	10.13	7.83
Median	4.98		6.26		8.12		5.87
IQR (Q1, Q3)	2.57	7.91	3.32	10.36	4.68	11.8	5.76	12
Range (min,max)	1.02	14.62	1.35	18.15	0.75	21.82	3.98	23.04
Known number of chemotherapy administration, N (%)	47	23.62	39	19.6	19	25.33	5	45.45
At least one chemotherapy administration, N (%)	24	51.06	16	41.03	17	89.47	5	100
Number of visits for chemotherapy administration (among patients with at least 1 visit)
Mean (SD)	6.76	3.73	8.99	4.19	8.66	4.12	9.73	8.26
Median	6.11		9.08		10.19		5.87
IQR (Q1, Q3)	3.87	8.85	4.89	12.05	4.84	11.34	5.76	12
Range (min,max)	1.4	14.62	2.57	15.13	2.71	15.82	1.99	23.04
At least one non-chemotherapy administration, N (%)	23		23		2		0
ED visit
Known number of ED visits, N (%)	110	55.2764	108	54.2714	46	61.3333	7	63.6364
At least one ED visit, N (%)	20	18.18	18	16.67	3	6.52	0	0
Annual number of visits (among patients with at least 1 visit)
Mean (SD)	3.2	2.03	3.59	1.85	3.11	1.68
Median	2.66		2.86		2.86
IQR (Q1, Q3)	1.74	4.29	2.61	4.29	1.57	4.9
Range (min,max)	0.83	8.57	1.66	8.57	1.57	4.9
Known number of chemotherapy administration, N (%)	20	10.05	18	9.05	3	4	0	0
At least one chemotherapy administration, N (%)	7	35	7	38.89	0	0	0
Annual number of visits for chemotherapy administration (among patients with at least 1 visit)
Mean (SD)	3.16	2.44	3.16	2.44
Median	2.61		2.61
IQR (Q1, Q3)	1.76	2.88	1.76	2.88
Range (min,max)	1.66	8.57	1.66	8.57
At least one non-chemotherapy administration, N (%)	13		11		3		0
Inpatient visits
At least one inpatient visit, N (%)	34	17.09	29	14.57	6	8	1	9.09
Annual number of visits (among patients with at least 1 visit)
Mean (SD)	4.07	4.85	4.61	5.1	3.02	1.11	30
Median	2.59		2.88		2.86		30
IQR (Q1, Q3)	1.57	4.34	1.76	4.59	2.45	3.55	30	30
Range (min,max)	0.83	25.71	1.17	25.71	1.57	4.86	30	30
Any health care visit, N (%)	169	84.92	168	84.42	63	84	10	90.91
Number of visits
Mean (SD)	9.34	6.64	7.1	5.78	5.21	3.38	5.34	2.78
Median	8.2		5.52		4.35		4.55
IQR (Q1, Q3)	4.76	12.86	3.58	8.93	2.7	7.03	3.39	7.55
Range (min,max)	0.48	46.83	0.35	46.83	0.48	18.08	1.69	9.59
Any Chemo visit, N (%)	164	82.41	163	81.91	61	81.33	10	90.91
Number of visits for chemotherapy administration
Mean (SD)	6.37	3.82	4.8	3.11	3.77	2.17	3.26	1.73
Median	5.39		3.91		3.25		3.11
IQR (Q1, Q3)	3.52	8.2	2.82	6.11	2.31	5.61	1.44	4.78
Range (min,max)	0.48	18	0.35	18	0.46	10.59	0.99	5.66
Any non-chemo visits	116	58.29	108	54.27	35	46.67	7	63.64
Received long-term care, N (%)	2	1.01	2	1.01	0	0	0	0
Received hospice care, N (%)	38	19.1	31	15.58	5	6.67	2	18.18

## Sheet: S6. Spain HCRU
Supplementary Table 6. Health Care Resource Utilization From Diagnosis of Advanced Soft Tissue Sarcoma, Overall and by Line of Therapy: Spain
Characteristic	Total		First line		Second line		Third line
	N	%	N	%	N	%	N	%
Patients receiving nth-line therapy	203	100	203	100	86	100	20	100
Outpatient Visits
Known number of outpatient visits, N (%)	132	65.02	130	64.04	64	74.42	18	90
At least one outpatient hospital visit, N (%)	127	96.21	124	95.38	64	100	18	100
Annual number of visits (among patients with at least 1 visit)
Mean (SD)	22.43	14.51	24.23	15.15	29.91	44.73	24.01	14.61
Median	19.49		21.11		20.87		20.53
IQR (Q1, Q3)	13.62	26.74	15.38	27.56	13.9	35.45	14.16	28.57
Range (min,max)	1.7	77.14	1.7	78.26	4.29	360	4.62	51.43
Known number of chemotherapy administration, N (%)	120	59.11	118	58.13	63	73.26	18	90
At least one chemotherapy administration, N (%)	115	95.83	114	96.61	58	92.06	16	88.89
Annual number of visits for chemotherapy administration (among patients with at least 1 visit)
Mean (SD)	16.78	9.72	18.32	10.64	18.49	11.35	20.17	11.38
Median	14.55		16.26		15.68		16.21
IQR (Q1, Q3)	11	20.25	11.93	20.57	10.91	22.5	12.55	20.71
Range (min,max)	1.3	51.43	1.96	61.71	1.7	64.8	10	51.43
At least one non-chemotherapy administration, N (%)	12		10		6		2
Outpatient Palliative care visits
Known number of outpatient palliative care visits, N (%)	128	63.05	124	61.08	63	73.26	18	90
At least one outpatient palliative care visit, N (%)	70	54.69	48	38.71	28	44.44	5	27.78
Annual number of visits (among patients with at least 1 visit)
Mean (SD)	6.21	5.02	7.95	5.04	7.15	7.73	7.18	3.18
Median	4.69		6.2		4.1		9.17
IQR (Q1, Q3)	2.02	8.23	4.09	12.25	3.18	9.4	4.68	9.44
Range (min,max)	0.97	19.78	0.97	19.78	1.49	39.13	2.86	9.73
Known number of chemotherapy administration, N (%)	68	33.5	46	22.66	28	32.56	5	25
At least one chemotherapy administration, N (%)	4	5.88	4	8.7	0	0	0	0
Annual number of visits for chemotherapy administration (among patients with at least 1 visit)
Mean (SD)	2.88	1	4.42	2.06
Median	2.83		4.38
IQR (Q1, Q3)	2.02	3.75	2.83	6.01
Range (min,max)	1.98	3.89	2.06	6.86
At least one non-chemotherapy administration, N (%)	66		44		28		5
Outpatient nurse visits
Known number of outpatient nurse visits, N (%)	0	0	0	0	0	0	0	0
At least one outpatient nurse visit, N (%)	0		0		0		0
Number of visits (among patients with at least 1 visit)
Annual number of visits (among patients with at least 1 visit)
Mean (SD)
Median
IQR (Q1, Q3)
Range (min,max)
Known number of chemotherapy administration, N (%)	0	0	0	0	0	0	0	0
At least one chemotherapy administration, N (%)	0		0		0		0
Number of visits for chemotherapy administration (among patients with at least 1 visit)
Mean (SD)
Median
IQR (Q1, Q3)
Range (min,max)
Known number of non-chemotherapy administration, N (%)
At least one non-chemotherapy administration, N (%)
ED visit
Known number of ED visits, N (%)	132	65.02	125	61.58	64	74.42	17	85
At least one ED visit, N (%)	113	85.61	91	72.8	48	75	11	64.71
Annual number of visits (among patients with at least 1 visit)
Mean (SD)	6.41	17.07	7.36	18.68	7.98	11.2	5.87	4.51
Median	3.67		4.02		4.57		4.29
IQR (Q1, Q3)	2.07	5.84	2.69	7.2	3.32	8.24	2.75	9.73
Range (min,max)	0.41	180	0.81	180	0.66	66.52	2.14	16
Known number of chemotherapy administration, N (%)	108	53.2	87	42.86	46	53.49	11	55
At least one chemotherapy administration, N (%)	31	28.7	23	26.44	9	19.57	0	0
Annual number of visits for chemotherapy administration (among patients with at least 1 visit)
Mean (SD)	2.47	2.26	3.03	1.54	7.69	8.07
Median	1.83		2.57		3.91
IQR (Q1, Q3)	1.32	2.57	1.9	3.64	2.37	12.86
Range (min,max)	0.41	12.49	0.81	7.2	1.17	25.71
At least one non-chemotherapy administration, N (%)	82		68		39		11
Inpatient visits
At least one inpatient visit, N (%)	75	36.9458	43	21.1823	25	29.0698	8	40
Annual number of visits (among patients with at least 1 visit)
Mean (SD)	5.24	20.62	7.93	27.03	3.55	3.12	5.2	5.74
Median	2.18		3.03		3.03		2.7
IQR (Q1, Q3)	1.33	3.21	2.18	3.96	1.72	3.91	2.08	5.98
Range (min,max)	0.41	180	0.97	180	0.66	15	1.61	18.46
Any health care visit, N (%)	204	100	203	99.51	82	100	11	91.67
Number of visits
Mean (SD)	25.81	91.48	15.83	41.63	24.4	89.4	3.75	3.47
Median	9.82		5.41		8.16		2.2
IQR (Q1, Q3)	4.4	17.46	3.19	13.91	4.19	13.53	1.89	4.54
Range (min,max)	0.52	1200	0.52	420	0.52	780	0.2	12.37
Any Chemo visit, N (%)	201	98.53	199	97.55	80	97.56	11	91.67
Number of visits for chemotherapy administration
Mean (SD)	21.17	81.62	12.55	33.85	21.69	83.79	1.73	1.48
Median	6.77		3.98		5.41		1.52
IQR (Q1, Q3)	3.04	14.35	2.38	10.14	1.73	12.98	0.63	2.1
Range (min,max)	0.34	1080	0.34	360	0.52	720	0.2	5.7
Any non-chemo visits	177	86.76	160	78.43	63	76.83	9	75
Office visit
Known number of office visits, N (%)	115	56.65	107	52.71	46	53.49	14	70
At least one office visit, N (%)	49	42.61	40	37.38	12	26.09	5	35.71
Annual number of visits (among patients with at least 1 visit)
Mean (SD)	9.4	11.64	11.09	12.41	14.46	15.98	12.15	7.22
Median	5.37		5.86		11.65		11.43
IQR (Q1, Q3)	3.3	10.4	3.82	14.43	3.06	13.78	7.14	12.57
Range (min,max)	1.04	68.57	1.43	68.57	2.23	58.7	5.63	24
Known number of chemotherapy administration, N (%)	42	20.69	35	17.24	10	11.63	5	25
At least one chemotherapy administration, N (%)	20	47.62	17	48.57	5	50	1	20
Annual number of visits for chemotherapy administration (among patients with at least 1 visit)
Mean (SD)	8.96	8.12	10.96	8.72	7.78	6.21	12.57
Median	7.53		11.74		6.79		12.57
IQR (Q1, Q3)	2.4	13.07	4.65	14.4	2.89	12.51	12.57	12.57
Range (min,max)	0.66	34.29	1.43	34.29	1.07	15.65	12.57	12.57
At least one non-chemotherapy administration, N (%)	29		23		7		4
Received long-term care, N (%)	6	2.96	5	2.46	0	0	1	5
Received hospice care, N (%)	55	27.09	27	13.3	24	27.91	3	15

## Sheet: S7. Germany HCRU
Supplementary Table 7. Health Care Resource Utilization From Diagnosis of Advanced Soft Tissue Sarcoma, Overall and by Line of Therapy: Germany
Characteristic	Total		First line		Second line		Third line
	N	%	N	%	N	%	N	%
Patients receiving nth-line therapy	204	100	204	100	82	100	12	100
Outpatient Visits
Known number of outpatient visits, N (%)	186	91.18	186	91.18	74	90.24	10	83.33
At least one outpatient hospital visit, N (%)	176	94.62	176	94.62	66	89.19	10	100
Annual number of visits (among patients with at least 1 visit)
Mean (SD)	38.74	27.19	38.82	39.42	50.38	31.93	29.53	19.88
Median	33.68		29.81		51.43		22.86
IQR (Q1, Q3)	20.19	49.66	18.51	50.94	24.55	64.29	19.46	28.57
Range (min,max)	2.59	225	2.59	405	6.86	171.43	12.86	77.14
Known number of chemotherapy administration, N (%)	176	86.27	176	86.27	65	79.27	10	83.33
At least one chemotherapy administration, N (%)	174	98.86	174	98.86	65	100	10	100
Annual number of visits for chemotherapy administration (among patients with at least 1 visit)
Mean (SD)	30.2	21.21	29.39	21.93	39.25	25.19	17.48	14.77
Median	26.24		20.53		41.54		17.14
IQR (Q1, Q3)	13.92	39.21	13.37	40.38	18.95	54.68	7.35	21.18
Range (min,max)	1.5	151.58	1.56	151.58	1.17	95.29	1.56	51.43
At least one non-chemotherapy administration, N (%)	2		2		1		0
Outpatient Palliative care visits
Known number of outpatient palliative care visits, N (%)	52	25.49	52	25.49	23	28.05	6	50
At least one outpatient palliative care visit, N (%)	7	13.46	7	13.46	0	0	0	0
Annual number of visits (among patients with at least 1 visit)
Mean (SD)	2.73	1.35	3.55	1.75
Median	3.03		3.24
IQR (Q1, Q3)	1.62	3.3	2.52	5.07
Range (min,max)	1.17	5.07	1.17	6.55
Known number of chemotherapy administration, N (%)	3	1.47	3	1.47	0	0	0	0
At least one chemotherapy administration, N (%)	0	0	0	0	0		0
Annual number of visits for chemotherapy administration (among patients with at least 1 visit)
Mean (SD)
Median
IQR (Q1, Q3)
Range (min,max)
At least one non-chemotherapy administration, N (%)	7		7		0		0
Outpatient nurse visits
Known number of outpatient nurse visits, N (%)	0	0	0	0	0	0	0	0
At least one outpatient nurse visit, N (%)	0		0		0		0
Number of visits (among patients with at least 1 visit)
Annual number of visits (among patients with at least 1 visit)
Mean (SD)
Median
IQR (Q1, Q3)
Range (min,max)
Known number of chemotherapy administration, N (%)	0	0	0	0	0	0	0	0
At least one chemotherapy administration, N (%)	0		0		0		0
Number of visits for chemotherapy administration (among patients with at least 1 visit)
Mean (SD)
Median
IQR (Q1, Q3)
Range (min,max)
Known number of non-chemotherapy administration, N (%)
At least one non-chemotherapy administration, N (%)
ED visit
Known number of ED visits, N (%)	46	22.55	46	22.55	24	29.27	6	50
At least one ED visit, N (%)	9	19.57	8	17.39	1	4.17	0	0
Annual number of visits (among patients with at least 1 visit)
Mean (SD)	10.3	15.97	11.65	16.77	13.71
Median	4.91		5.63		13.71
IQR (Q1, Q3)	2.64	8.2	3.79	9.73	13.71	13.71
Range (min,max)	1.59	49.29	2.28	49.29	13.71	13.71
Known number of chemotherapy administration, N (%)	8	3.92	8	3.92	0	0	0	0
At least one chemotherapy administration, N (%)	1	12.5	1	12.5	0		0
Annual number of visits for chemotherapy administration (among patients with at least 1 visit)
Mean (SD)	38.57		38.57
Median	38.57		38.57
IQR (Q1, Q3)	38.57	38.57	38.57	38.57
Range (min,max)	38.57	38.57	38.57	38.57
At least one non-chemotherapy administration, N (%)	8		7		1		0
Inpatient visits
At least one inpatient visit, N (%)	45	22.06	38	18.63	6	7.32	2	16.67
Annual number of visits (among patients with at least 1 visit)
Mean (SD)	5.02	5.07	5.86	5.02	5.63	7.32	5.68	6.93
Median	3.32		3.71		3.2		5.68
IQR (Q1, Q3)	1.68	5.81	3.27	6	0.83	5.9	0.78	10.59
Range (min,max)	0.53	24	0.78	24	0.65	20	0.78	10.59
Any health care visit, N (%)	204	100	203	99.51	82	100	11	91.67
Number of visits
Mean (SD)	25.81	91.48	15.83	41.63	24.4	89.4	3.75	3.47
Median	9.82		5.41		8.16		2.2
IQR (Q1, Q3)	4.4	17.46	3.19	13.91	4.19	13.53	1.89	4.54
Range (min,max)	0.52	1200	0.52	420	0.52	780	0.2	12.37
Any Chemo visit, N (%)	201	98.53	199	97.55	80	97.56	11	91.67
Number of visits for chemotherapy administration
Mean (SD)	21.17	81.62	12.55	33.85	21.69	83.79	1.73	1.48
Median	6.77		3.98		5.41		1.52
IQR (Q1, Q3)	3.04	14.35	2.38	10.14	1.73	12.98	0.63	2.1
Range (min,max)	0.34	1080	0.34	360	0.52	720	0.2	5.7
Any non-chemo visits	177	86.76	160	78.43	63	76.83	9	75
Office visit
Known number of office visits, N (%)	60	29.41	59	28.92	29	35.37	6	50
At least one office visit, N (%)	28	46.67	27	45.76	16	55.17	1	16.67
Annual number of visits (among patients with at least 1 visit)
Mean (SD)	32.85	23.2	31.94	25.16	45.26	33.34	21.82
Median	26.83		25.49		37.7		21.82
IQR (Q1, Q3)	17.28	40.59	14.82	42.08	16.24	69.95	21.82	21.82
Range (min,max)	4.92	109.46	5.45	120	4.29	112.5	21.82	21.82
Known number of chemotherapy administration, N (%)	27	13.24	26	12.75	15	18.29	1	8.33
At least one chemotherapy administration, N (%)	26	96.3	24	92.31	15	100	1	100
Annual number of visits for chemotherapy administration (among patients with at least 1 visit)
Mean (SD)	29.3	24.95	30.39	26.54	36.7	28.39	10.91
Median	19.65		19.65		24.55		10.91
IQR (Q1, Q3)	13.94	40.37	14.12	41.97	18	59.18	10.91	10.91
Range (min,max)	2.34	109.46	8.31	120	2.48	88.77	10.91	10.91
At least one non-chemotherapy administration, N (%)	2		3		1		0
Received long-term care, N (%)	1	0.49	1	0.49	0	0	0	0
Received hospice care, N (%)	81	39.71	60	29.41	17	20.73	3	25

## Sheet: S8. France HCRU
Supplementary Table 8. Health Care Resource Utilization From Diagnosis of Advanced Soft Tissue Sarcoma, Overall and by Line of Therapy: France
Characteristic	Total		First line		Second line		Third line
	N	%	N	%	N	%	N	%
Patients receiving nth-line therapy	201	100	201	100	108	100	46	100
Outpatient Visits
Known number of outpatient visits, N (%)	151	75.12	149	74.13	88	81.48	39	84.78
At least one outpatient hospital visit, N (%)	105	69.54	97	65.1	46	52.27	19	48.72
Annual number of visits (among patients with at least 1 visit)
Mean (SD)	15.03	19.89	17.71	23.54	19.5	19.42	19.7	15.26
Median	11.16		13.33		14.69		14.47
IQR (Q1, Q3)	6.61	17.28	8.53	18.46	9.15	19.29	8.37	24.83
Range (min,max)	1.2	180	1.43	180	1.08	102.86	3.13	51.43
Known number of chemotherapy administration, N (%)	96	47.76	87	43.28	44	40.74	18	39.13
At least one chemotherapy administration, N (%)	85	88.54	75	86.21	38	86.36	15	83.33
Annual number of visits for chemotherapy administration (among patients with at least 1 visit)
Mean (SD)	15.18	20.47	18.41	21.2	20.79	20.57	23.61	14.4
Median	11.61		15		14.69		18.08
IQR (Q1, Q3)	7.35	17.28	11.16	19.46	9.73	19.29	13.33	37.53
Range (min,max)	1.25	180	1.43	180	0.54	102.86	8.06	51.43
At least one non-chemotherapy administration, N (%)	20		22		8		4
Outpatient Palliative care visits
Known number of outpatient palliative care visits, N (%)	147	73.13	143	71.14	87	80.56	38	82.61
At least one outpatient palliative care visit, N (%)	27	18.37	12	8.39	12	13.79	6	15.79
Annual number of visits (among patients with at least 1 visit)
Mean (SD)	5.49	5.74	9.56	7.13	8.06	5.44	9.33	8.14
Median	3.64		8.78		7.13		6.57
IQR (Q1, Q3)	1.83	6.33	3.92	12.82	3.92	11.75	3.53	11.08
Range (min,max)	0.84	27.69	2.2	27.69	1.08	18.7	3.44	24.83
Known number of chemotherapy administration, N (%)	27	13.43	12	5.97	12	11.11	6	13.04
At least one chemotherapy administration, N (%)	4	14.81	3	25	4	33.33	0	0
Annual number of visits for chemotherapy administration (among patients with at least 1 visit)
Mean (SD)	5.04	4.73	6.66	5.59	5.29	4.15
Median	3.86		5.37		4.98
IQR (Q1, Q3)	1.69	8.4	1.84	12.78	2.61	7.97
Range (min,max)	0.84	11.61	1.84	12.78	0.54	10.64
At least one non-chemotherapy administration, N (%)	23		9		8		6
Outpatient nurse visits
Known number of outpatient nurse visits, N (%)	0	0	0	0	0	0	0	0
At least one outpatient nurse visit, N (%)	0		0		0		0
Number of visits (among patients with at least 1 visit)
Annual number of visits (among patients with at least 1 visit)
Mean (SD)
Median
IQR (Q1, Q3)
Range (min,max)
Known number of chemotherapy administration, N (%)	0	0	0	0	0	0	0	0
At least one chemotherapy administration, N (%)	0		0		0		0
Number of visits for chemotherapy administration (among patients with at least 1 visit)
Mean (SD)
Median
IQR (Q1, Q3)
Range (min,max)
Known number of non-chemotherapy administration, N (%)
At least one non-chemotherapy administration, N (%)
ED visit
Known number of ED visits, N (%)	144	71.64	142	70.65	87	80.56	38	82.61
At least one ED visit, N (%)	34	23.61	18	12.68	16	18.39	4	10.53
Annual number of visits (among patients with at least 1 visit)
Mean (SD)	16.01	61.57	28.96	83.57	9.48	13.43	128.4	200.62
Median	2.66		4.9		4.24		17.14
IQR (Q1, Q3)	1.79	5.99	3.6	10.75	3.24	8.15	8.06	360
Range (min,max)	0.49	360	1.63	360	1.08	51.43	8.06	360
Known number of chemotherapy administration, N (%)	30	14.93	18	8.96	14	12.96	2	4.35
At least one chemotherapy administration, N (%)	8	26.67	6	33.33	4	28.57	0	0
Annual number of visits for chemotherapy administration (among patients with at least 1 visit)
Mean (SD)	50.97	125.06	67.34	143.56	3.55	2.11
Median	4.73		7.83		4.17
IQR (Q1, Q3)	2.44	16.28	4.29	22.27	2.11	4.98
Range (min,max)	0.84	360	1.84	360	0.54	5.29
At least one non-chemotherapy administration, N (%)	26		12		12		4
Inpatient visits
At least one inpatient visit, N (%)	92	45.77	76	37.81	39	36.11	13	28.26
Annual number of visits (among patients with at least 1 visit)
Mean (SD)	12.4	11.3	15.01	9.66	19.54	14.65	17.51	14
Median	9.2		15.54		18.83		12.85
IQR (Q1, Q3)	3.17	18.54	6.49	20.57	6.42	28.42	5.07	24
Range (min,max)	0.41	48	1.09	48	0.44	60	1.5	41.9
Any health care visit, N (%)	204	100	203	99.51	82	100	11	91.67
Number of visits
Mean (SD)	25.81	91.48	15.83	41.63	24.4	89.4	3.75	3.47
Median	9.82		5.41		8.16		2.2
IQR (Q1, Q3)	4.4	17.46	3.19	13.91	4.19	13.53	1.89	4.54
Range (min,max)	0.52	1200	0.52	420	0.52	780	0.2	12.37
Any Chemo visit, N (%)	201	98.53	199	97.55	80	97.56	11	91.67
Number of visits for chemotherapy administration
Mean (SD)	21.17	81.62	12.55	33.85	21.69	83.79	1.73	1.48
Median	6.77		3.98		5.41		1.52
IQR (Q1, Q3)	3.04	14.35	2.38	10.14	1.73	12.98	0.63	2.1
Range (min,max)	0.34	1080	0.34	360	0.52	720	0.2	5.7
Any non-chemo visits	177	86.76	160	78.43	63	76.83	9	75
Office visit
Known number of office visits, N (%)	159	79.1	157	78.11	96	88.89	39	84.78
At least one office visit, N (%)	122	76.73	110	70.06	64	66.67	26	66.67
Annual number of visits (among patients with at least 1 visit)
Mean (SD)	19.87	66.42	21.99	69.79	12.73	9.35	26.12	59.47
Median	9.31		10.96		9.64		12.37
IQR (Q1, Q3)	6.05	18.74	6.55	20.57	7.2	15.88	7.13	20.93
Range (min,max)	1.17	720	1.74	720	2.16	51.43	5.17	308.57
Known number of chemotherapy administration, N (%)	111	55.22	99	49.25	43	39.81	23	50
At least one chemotherapy administration, N (%)	71	63.96	55	55.56	21	48.84	15	65.22
Annual number of visits for chemotherapy administration (among patients with at least 1 visit)
Mean (SD)	11.32	7.18	14.26	6.39	14.41	6.75	32.36	76.63
Median	11.17		13.42		13.65		12.37
IQR (Q1, Q3)	4.81	16.17	10.91	18.31	10.9	19.33	8.31	18.51
Range (min,max)	1.43	34.29	1.43	34.29	1.62	25.71	5.17	308.57
At least one non-chemotherapy administration, N (%)	51		55		43		11
Received long-term care, N (%)	4	1.99	0	0	2	1.85	2	4.35
Received hospice care, N (%)	0	0	0	0	0	0	0	0

## Sheet: S9. UK Detailed Hosp
Supplementary Table 9. Detailed Hospital Description: United Kingdom
Characteristic	Total		During first-line		Second-line		Between end of first-line and start of second-line		Third-line		Fourth-line		From the end of first line to end of follow-up or death (those who received first-line only)		From the end of second line to end of follow-up or death (those who received second-line only)		From the end of third line to end of follow-up or death (those who received third-line only)		From the end of fourth line to end of follow-up or death (those who received fourth-line only)
	N	%	N	%	N	%	N	%	N	%	N	%	N	%	N	%	N	%	N	%
All hospitalizations	50	100	11	100	6	100	0	0	1	100	2	100	27	100	1	100	1	100	1	100
Department the patient was admitted to
General ward	18	0.36	4	0.3636	1	0.1667			0	0	0	0	13	0.4815	0	0	0	0	0	0
Length of stay (among those with at least one stay)
Mean (SD)	7.6111	8.2115	6.25	11.1766	9								7.9231	7.9631
Median	2		1		9								2
IQR (Q1, Q3)	1	13	0.5	12	9	9							2	13
Range (min, max)	0	23	0	23	9	9							0	21
Oncology ward	35	0.7	7	0.6364	5	0.8333			1	1	2	1	17	0.6296	1	1	1	1	1	1
Length of stay (among those with at least one stay)
Mean (SD)	7.4286	6.8225	7.4286	5.5635	10.4	9.5026			22		3	0	6.4706	6.4432	3		12		3
Median	5		6		8				22		3		5		3		12		3
IQR (Q1, Q3)	2	12	3	15	6	8			22	22	3	3	2	9	3	3	12	12	3	3
Range (min, max)	0	27	2	15	3	27			22	22	3	3	0	21	3	3	12	12	3	3
Intensive care unit	3	0.06	0	0	0	0			0	0	0	0	3	0.1111	0	0	0	0	0	0
Length of stay (among those with at least one stay)
Mean (SD)	18	4.3589											18	4.3589
Median	20												20
IQR (Q1, Q3)	13	21											13	21
Range (min, max)	13	21											13	21
Other	0	0	0	0	0	0			0	0	0	0	0	0	0	0	0	0	0	0
Length of stay (among those with at least one stay)
Mean (SD)
Median
IQR (Q1, Q3)
Range (min, max)
Reason for hospitalization (known cases)
Treatment-related procedures (excluding hospitalizations only for chemotherapy administration)	4	0.08	2	0.1818	0	0			0	0	0	0	2	0.0741	0	0	0	0	0	0
Length of stay (among those with at least one stay)
Mean (SD)	12.75	7.1356	9	8.4853									16.5	4.9497
Median	14		9										16.5
IQR (Q1, Q3)	8	17.5	3	15									13	20
Range (min, max)	3	20	3	15									13	20
Chemotherapy administration	4	0.08	0	0	1	0.1667			0	0	2	1	0	0	0	0	0	0	1	1
Length of stay (among those with at least one stay)
Mean (SD)	4.5	3			9						3	0							3
Median	3				9						3								3
IQR (Q1, Q3)	3	6			9	9					3	3							3	3
Range (min, max)	3	9			9	9					3	3							3	3
Management of toxicities/ side-effects related to treatment or procedures	13	0.26	6	0.545455	5	0.833333		0		0		0	2	0.0740741		0		0		0
Length of stay (among those with at least one stay)
Mean (SD)	8.3077	6.6631	5.5	5.5408	6.8	2.3875							20.5	0.7071
Median	8		4.5		8								20.5
IQR (Q1, Q3)	3	9	1	8	6	8							20	21
Range (min, max)	0	21	0	15	3	9							20	21
Nausea/Vomiting	8	0.16	4	0.3636	2	0.3333			0	0	0	0	2	0.0741	0	0	0	0	0	0
Stomatitis/mucositis	2	0.04	2	0.1818	0	0			0	0	0	0	0	0	0	0	0	0	0	0
Thrombosis of vein	1	0.02	0	0	1	0.1667			0	0	0	0	0	0	0	0	0	0	0	0
Radiation complication	0	0	0	0	0	0			0	0	0	0	0	0	0	0	0	0	0	0
Sloughing of skin around injection site	1	0.02	0	0	0	0			0	0	0	0	1	0.037	0	0	0	0	0	0
Other	4	0.08	2	0.1818	2	0.3333			0	0	0	0	0	0	0	0	0	0	0	0
Disease progression or complications	14	0.28	1	0.0909	1	0.1667			0	0	0	0	10	0.3704	1	1	1	1	0	0
Length of stay (among those with at least one stay)
Mean (SD)	12.2857	9.2273	23		27								10.7	8.59	3		12
Median	12		23		27								8.5		3		12
IQR (Q1, Q3)	3	21	23	23	27	27							2	20	3	3	12	12
Range (min, max)	1	27	23	23	27	27							1	21	3	3	12	12
Palliative care	31	0.62	3	0.2727	1	0.1667			1	1	0	0	24	0.8889	1	1	1	1	0	0
Length of stay (among those with at least one stay)
Mean (SD)	6.9032	7.591	6	7.8102	27				22				5.5	6.1996	3		12
Median	2		2		27				22				2		3		12
IQR (Q1, Q3)	2	12	1	15	27	27			22	22			2	7.5	3	3	12	12
Range (min, max)	0	27	1	15	27	27			22	22			0	21	3	3	12	12
Reason unrelated to STS	1	0.02	0	0	0	0			0	0	0	0	1	0.037	0	0	0	0	0	0
Length of stay (among those with at least one stay)
Mean (SD)	21												21
Median	21												21
IQR (Q1, Q3)	21	21											21	21
Range (min, max)	21	21											21	21

## Sheet: S10. Spain Detailed Hosp
Supplementary Table 10. Detailed Hospital Description: Spain
Characteristic	Total		During first-line		Second-line		Between end of first-line and start of second-line		Third-line		Fourth-line		Fifth-line		From the end of first line to end of follow-up or death (those who received first-line only)		From the end of second line to end of follow-up or death (those who received second-line only)		From the end of third line to end of follow-up or death (those who received third-line only)		From the end of fourth line to end of follow-up or death (those who received fourth-line only)		From the end of fifth line to end of follow-up or death (those who received fifth-line only)
	N	%	N	%	N	%	N	%	N	%	N	%			N	%	N	%	N	%	N	%	N	%
All hospitalizations	112	100	30	100	13	100	2	100	4	100	1	100	1	100	22	100	19	100	11	100	7	100	2	100
Department the patient was admitted to
General ward	3	0.0268	1	0.0333	0	0	0	0	0	0	0	0	0	0	0	0	1	0.0526	1	0.0909	0	0	0	0
Length of stay (among those with at least one stay)
Mean (SD)	9.3333	6.5064	3														9		16
Median	9		3														9		16
IQR (Q1, Q3)	3	16	3	3													9	9	16	16
Range (min, max)	3	16	3	3													9	9	16	16
Oncology ward	98	0.875	27	0.9	12	0.9231	2	1	4	1	1	1	1	1	19	0.8636	14	0.7368	9	0.8182	7	1	2	1
Length of stay (among those with at least one stay)
Mean (SD)	9.602	7.542	9.8519	5.6412	11.9167	9.1697	6.5	6.364	7.25	0.5	1		3		12.8421	9.2151	9.7143	5.7703	8.4444	9.0569	1.2857	0.7559	10.5	13.435
Median	8		9		7.5		6.5		7		1		3		10		9		8		1		10.5
IQR (Q1, Q3)	4	13	6	14	5.5	21	2	11	7	7.5	1	1	3	3	5	20	7	13	1	11	1	1	1	20
Range (min, max)	1	35	1	24	2	27	2	11	7	8	1	1	3	3	3	35	3	25	1	28	1	3	1	20
Intensive care unit	3	0.0268	1	0.0333	1	0.0769	0	0	0	0	0	0	0	0	1	0.0455	0	0	0	0	0	0	0	0
Length of stay (among those with at least one stay)
Mean (SD)	10.3333	2.8868	7		12										12
Median	12		7		12										12
IQR (Q1, Q3)	7	12	7	7	12	12									12	12
Range (min, max)	7	12	7	7	12	12									12	12
Other	9	0.0804	1	0.0333	0	0	0	0	0	0	0	0	0	0	2	0.0909	4	0.2105	2	0.1818	0	0	0	0
Length of stay (among those with at least one stay)
Mean (SD)	12.1111	6.6792	2												9	7.0711	14.5	6.8069	15.5	0.7071
Median	15		2												9		16		15.5
IQR (Q1, Q3)	5	16	2	2											4	14	10	19	15	16
Range (min, max)	2	21	2	2											4	14	5	21	15	16
Reason for hospitalization (known cases)
Treatment-related procedures (excluding hospitalizations only for chemotherapy administration)	6	0.0536	4	0.1333	0	0	0	0	0	0	0	0	0	0	0	0	0	0	2	0.1818	0	0	0	0
Length of stay (among those with at least one stay)
Mean (SD)	10.3333	5.6451	7.75	5.1235															15.5	0.7071
Median	11		6.5																15.5
IQR (Q1, Q3)	6	15	4.5	11															15	16
Range (min, max)	3	16	3	15															15	16
Chemotherapy administration	22	0.1964	4	0.1333	1	0.0769	1	0.5	0	0	1	1	1	1	2	0.0909	1	0.0526	4	0.3636	6	0.8571	1	0.5
Length of stay (among those with at least one stay)
Mean (SD)	5.1818	7.281	12.75	11.3541	10		11				1		3		11.5	12.0208	4		1	0	1	0	1
Median	1		12.5		10		11				1		3		11.5		4		1		1		1
IQR (Q1, Q3)	1	4	3	22.5	10	10	11	11			1	1	3	3	3	20	4	4	1	1	1	1	1	1
Range (min, max)	1	24	2	24	10	10	11	11			1	1	3	3	3	20	4	4	1	1	1	1	1	1
Management of toxicities/ side-effects related to treatment or procedures	29	0.258929	17	0.566667	4	0.307692		0	1	0.25		0		0	3	0.136364	3	0.157895	1	0.0909091		0		0
Length of stay (among those with at least one stay)
Mean (SD)	10.5517	6.506	9.6471	4.8081	10.25	10.7199			7						16.6667	12.3423	11	3.6056	11
Median	9		9		6				7						20		10		11
IQR (Q1, Q3)	6	15	6	13	3.5	17			7	7					3	27	8	15	11	11
Range (min, max)	1	27	1	16	3	26			7	7					3	27	8	15	11	11
Nausea/Vomiting	10	0.0893	8	0.2667	0	0	0	0	0	0	0	0	0	0	1	0.0455	1	0.0526	0	0	0	0	0	0
Stomatitis/mucositis	11	0.0982	6	0.2	1	0.0769	0	0	0	0	0	0	0	0	2	0.0909	1	0.0526	1	0.0909	0	0	0	0
Thrombosis of vein	9	0.0804	4	0.1333	1	0.0769	0	0	0	0	0	0	0	0	1	0.0455	2	0.1053	1	0.0909	0	0	0	0
Radiation complication	0	0	0	0	0	0	0	0	0	0	0	0	0	0	0	0	0	0	0	0	0	0	0	0
Sloughing of skin around injection site	0	0	0	0	0	0	0	0	0	0	0	0	0	0	0	0	0	0	0	0	0	0	0	0
Other	9	0.0804	6	0.2	2	0.1538	0	0	1	0.25	0	0	0	0	0	0	0	0	0	0	0	0	0	0
Disease progression or complications	43	0.3839	9	0.3	7	0.5385	2	1	3	0.75	0	0	0	0	11	0.5	7	0.3684	2	0.1818	1	0.1429	1	0.5
Length of stay (among those with at least one stay)
Mean (SD)	10.8837	7.8017	10.2222	7.5792	12	9.1287	6.5	6.364	7.3333	0.5774					10.4545	8.8698	11.5714	6.2678	19	12.7279	3		20
Median	8		8		7		6.5		7						7		10		19		3		20
IQR (Q1, Q3)	7	13	6	12	7	22	2	11	7	8					5	13	7	13	10	28	3	3	20	20
Range (min, max)	1	35	1	24	2	27	2	11	7	8					4	35	7	25	10	28	3	3	20	20
Palliative care	40	0.3571	4	0.1333	2	0.1538	0	0	0	0	0	0	0	0	15	0.6818	14	0.7368	4	0.3636	0	0	1	0.5
Length of stay (among those with at least one stay)
Mean (SD)	12.5	6.6332	15.75	6.2383	23.5	4.9497									11.3333	6.5429	11.1429	6.5264	11	2.9439			20
Median	11.5		15		23.5										12		10		10.5				20
IQR (Q1, Q3)	7	16.5	11.5	20	20	27									5	16	7	15	9	13			20	20
Range (min, max)	3	27	9	24	20	27									3	25	3	25	8	15			20	20
Reason unrelated to STS	2	0.0179	2	0.0667	0	0	0	0	0	0	0	0	0	0	0	0	0	0	0	0	0	0	0	0
Length of stay (among those with at least one stay)
Mean (SD)	5	2.8284	5	2.8284
Median	5		5
IQR (Q1, Q3)	3	7	3	7
Range (min, max)	3	7	3	7

[truncated: 6 more sheets: S11. Germany Detailed Hosp, S12. France Detailed Hosp, S13. UK Detailed Costs, S14. Spain Detailed Costs, S15. Germany Detailed Cost, S16. France Detailed Costs]
